# Supplementary material for: Coding and noncoding variants in EBF3 are involved in HADDS and simplex autism
Source: Springer Nature journal article supplement (doi:10.1186/s40246-021-00342-3), 2021-07-13
Supplement: MOESM2 [file 40246_2021_342_MOESM2_ESM.pdf]

**Fig S1**

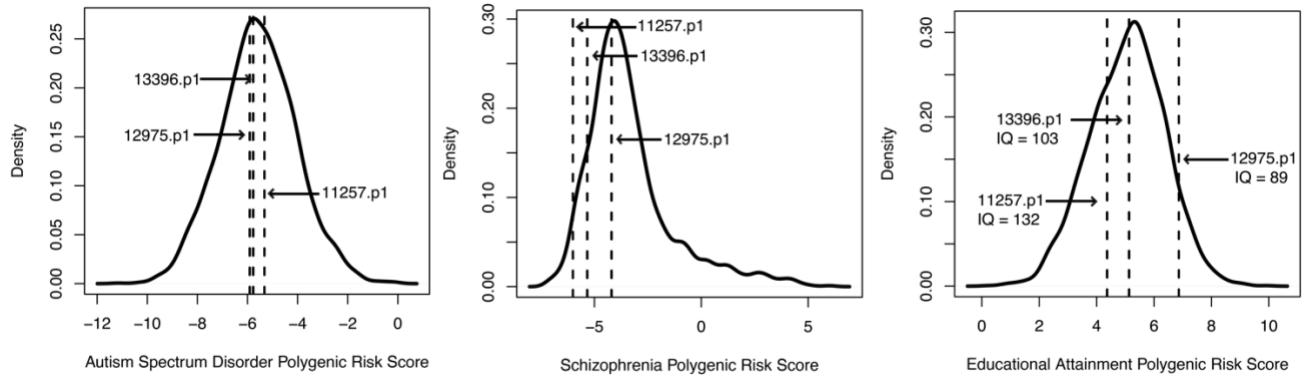

Polygenic risk scores (PRS) for the three individuals with *hs737* mutations

**Fig. S2.**

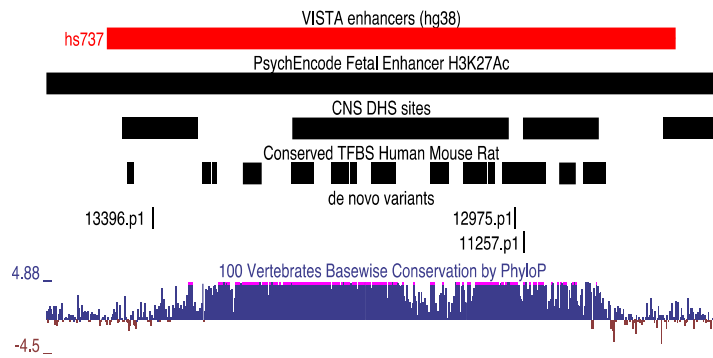

Zoom in on the *hs737* enhancer with annotations from other datasets. The enhancer is in a PsychEncode fetal enhancer, contains central nervous system DNaseI hypersensitive sites, contains conserved transcription factor binding sites, and is highly conserved across the vertebrate lineage. Also shown are the locations of the *hs737* *de novo* mutations identified in individuals with autism.

**Fig S3.**

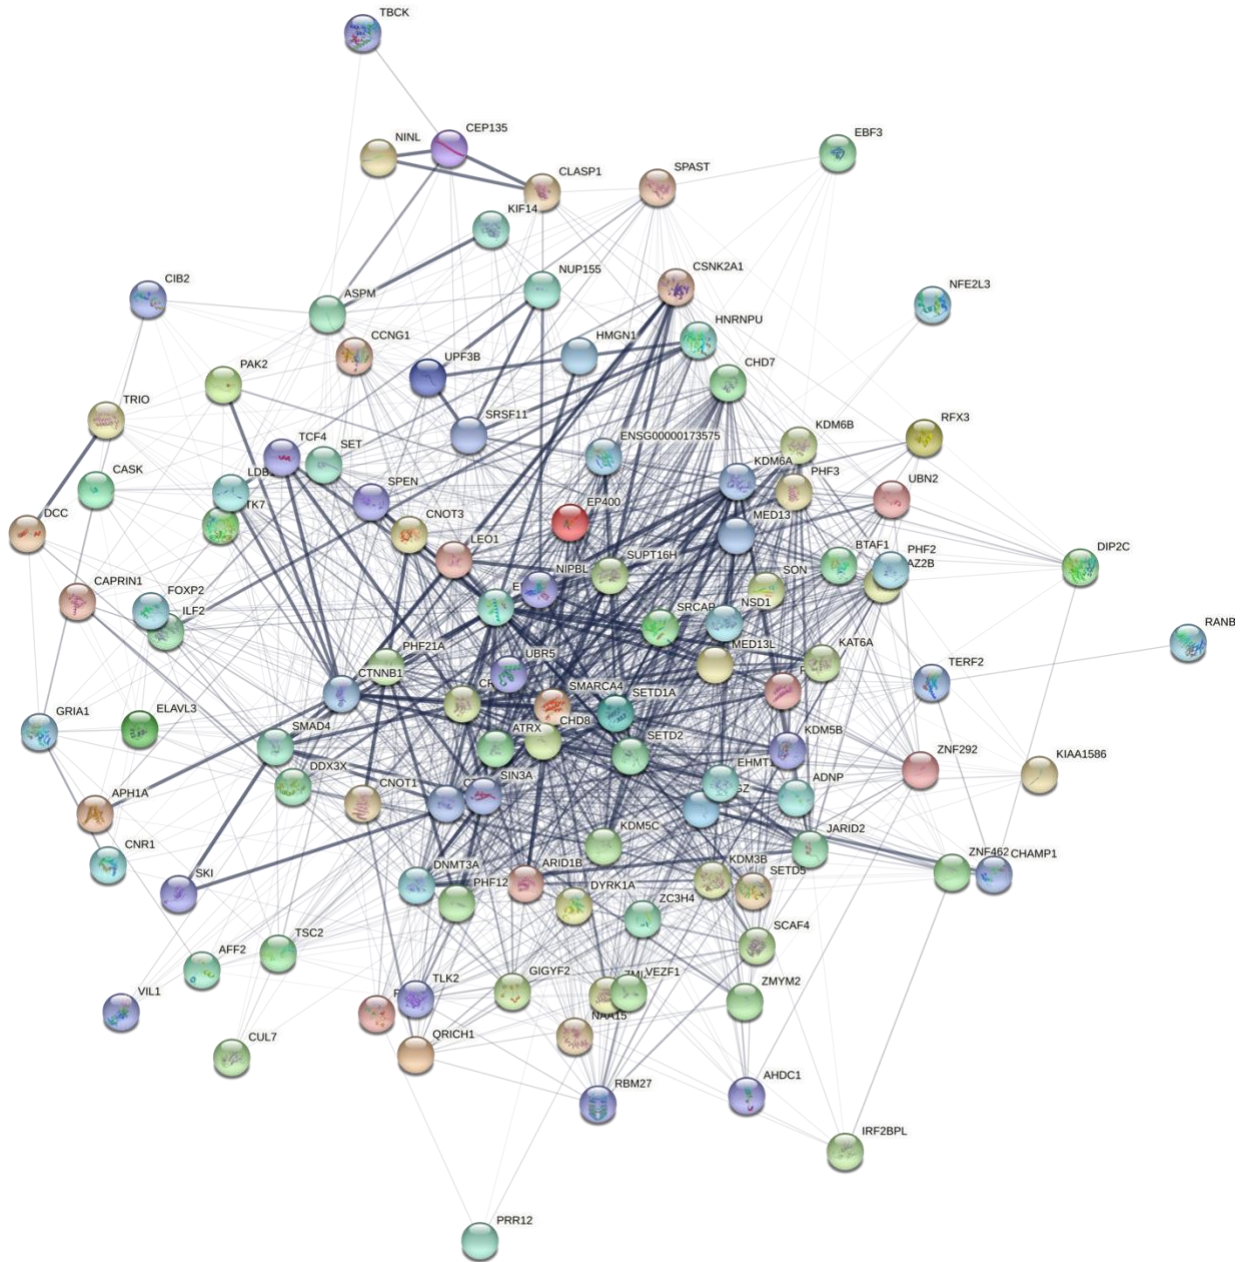

String-db network analysis, predicts interactions between *EBF3* and *SPAST*, *CSNK2A1*, *HNRNPU*, *CHD7*, *KDM6A*, *KDM6B*

**Table S2.**

| enhancerID | nsample.adj | nsnv | nsnv.analysis | ndenovo | score | pvalue.Poisson |
|------------|-------------|------|---------------|---------|-------|----------------|
| hs737      | 2671        | 1137 | 1137          | 3       | 1.641 | 0.00011221     |
| hs2333     | 2671        | 2281 | 2281          | 3       | 1.082 | 0.0003967      |
| hs1330     | 2671        | 2148 | 2148          | 2       | 1.226 | 0.0080814      |
| hs1574     | 2671        | 2590 | 2590          | 2       | 1.273 | 0.01424403     |
| hs1391     | 2671        | 2860 | 2860          | 2       | 0.535 | 0.0171281      |
| hs2543     | 2671        | 3181 | 3181          | 2       | 1.294 | 0.02933883     |
| hs2094     | 2671        | 4135 | 4135          | 2       | 0.85  | 0.0452304      |
| hs357      | 2671        | 714  | 714           | 1       | 0.399 | 0.04595281     |
| hs1        | 2671        | 639  | 639           | 1       | 0.43  | 0.04781171     |
| hs71       | 2671        | 858  | 858           | 1       | 0.516 | 0.06021351     |
| hs816      | 2671        | 1113 | 1113          | 1       | 0.173 | 0.06101038     |
| hs762      | 2671        | 901  | 901           | 1       | 0.257 | 0.06406557     |
| hs967      | 2671        | 1177 | 1177          | 1       | 0.334 | 0.06628823     |
| hs798      | 2671        | 1234 | 1234          | 1       | 0.396 | 0.06913811     |
| hs701      | 2671        | 1118 | 1118          | 1       | 0.326 | 0.07495069     |
| hs573      | 2671        | 1308 | 1308          | 1       | 0.162 | 0.07588227     |
| hs722      | 2671        | 1350 | 1350          | 1       | 0.196 | 0.07789904     |
| hs26       | 2671        | 1098 | 1098          | 1       | 0.992 | 0.07911685     |
| hs759      | 2671        | 1329 | 1329          | 1       | 0.485 | 0.07932293     |
| hs658      | 2671        | 1384 | 1384          | 1       | 0.346 | 0.08087798     |
| hs742      | 2671        | 1630 | 1630          | 1       | 0.527 | 0.09246516     |
| hs312      | 2671        | 1367 | 1367          | 1       | 0.41  | 0.09950883     |
| hs796      | 2671        | 1589 | 1589          | 1       | 0.174 | 0.10073273     |
| hs204      | 2671        | 1560 | 1560          | 1       | 0.207 | 0.11156034     |
| hs2063     | 2671        | 1852 | 1852          | 1       | 0.299 | 0.11468139     |
| hs2563     | 2671        | 2743 | 2743          | 1       | 0.231 | 0.17260254     |
| hs2199     | 2671        | 3680 | 3680          | 1       | 0.466 | 0.25566277     |
| hs2240     | 2671        | 4457 | 4457          | 1       | 0.775 | 0.30321029     |
| hs2207     | 2671        | 5388 | 5388          | 1       | 0.654 | 0.36778757     |

fitDNM results for *de novo* mutations in VISTA enhancers driving brain expression

**Table S3.**

| VISTA enhancer this individual also has a mutation in | Chromosome | Position hg38 | Reference | Alternate | Sample   | Annotation       | Gene Name       | Franklin Input (hg19) | Franklin Classification |
|-------------------------------------------------------|------------|---------------|-----------|-----------|----------|------------------|-----------------|-----------------------|-------------------------|
| hs737                                                 | chr7       | 65954087      | C         | T         | 11257.p1 | missense_variant | <i>VKORC1L1</i> | chr7:65419074-C-T     | VUS                     |
| hs737                                                 | chr3       | 128087731     | A         | T         | 11257.p1 | missense_variant | <i>RUVBL1</i>   | chr3:127806574-A-T    | VUS                     |
| hs737                                                 | chr9       | 127508511     | C         | T         | 12975.p1 | missense_variant | <i>FAM129B</i>  | chr9:130270790-C-T    | VUS                     |
| hs737                                                 | chr20      | 41416790      | C         | T         | 12975.p1 | missense_variant | <i>CHD6</i>     | chr20:40045430-C-T    | VUS                     |
| hs737                                                 | chr11      | 17771983      | G         | A         | 12975.p1 | missense_variant | <i>KCNKI</i>    | chr11:17793530-G-A    | VUS                     |

Other *de novo* SNVs/indels seen in individuals with hs737 enhancer mutations

**Table S4.**

| VISTA enhancer this individual also has a mutation in | Franklin input (on hg19)      | Franklin_Classification | PatientID | Band    | Gender |
|-------------------------------------------------------|-------------------------------|-------------------------|-----------|---------|--------|
| hs737                                                 | DEL:chr11:121264079-122897730 | Uncertain               | 12975.p1  | 11q24.1 | Male   |

Other copy number variation in individuals with *hs737* *de novo* mutations.

**Table S5.**

| Construct | Fold change from basal | Standard error | t-stat     | p value    |
|-----------|------------------------|----------------|------------|------------|
| hs737 WT  | 1.5                    | 1979.3E-4      | -2.1389391 | 0.06488352 |
| hs737.1   | 5291.0E-4              | 990.8E-4       | 4.35923292 | 0.00331729 |
| hs737.2   | 3490.1E-4              | 490.6E-4       | 5.61490204 | 0.00136208 |
| hs737.3   | 4522.9E-4              | 587.9E-4       | 5.04514053 | 0.00234488 |

Statistical significance calculations for the luciferase assays.

**Table S6.**

| transcription factor | forebrain expression | midbrain expression | hindbrain expression |
|----------------------|----------------------|---------------------|----------------------|
| Sox10                | no                   | no                  | yes                  |
| Sox14                | no                   | yes                 | yes                  |
| Sox8                 | yes                  | no                  | yes                  |
| Sox9                 | yes                  | yes                 | yes                  |
| Sox17                | yes                  | yes                 | yes                  |
| Sox5                 | yes                  | yes                 | yes                  |
| Sox3                 | yes                  | yes                 | yes                  |
| Sox18                | yes                  | yes                 | yes                  |
| Sox12                | yes                  | yes                 | yes                  |
| Sox6                 | yes                  | yes                 | yes                  |
| Sox21                | yes                  | yes                 | yes                  |
| Sox7                 | yes                  | yes                 | yes                  |
| Sox11                | yes                  | yes                 | yes                  |
| Sox13                | yes                  | yes                 | yes                  |
| Sox2                 | yes                  | yes                 | yes                  |
| Sox4                 | yes                  | yes                 | yes                  |
| Sox1                 | yes                  | yes                 | yes                  |
| Arid3b               | yes                  | yes                 | yes                  |
| Arid1a               | yes                  | yes                 | yes                  |
| Arid3a               | yes                  | yes                 | yes                  |
| Arid5b               | yes                  | yes                 | yes                  |
| Arid4a               | yes                  | yes                 | yes                  |
| Arx                  | yes                  | yes                 | no                   |

Expression of transcription factors potentially binding at variant locations in the hs737 enhancers.
