# Supplementary material for: Coding and noncoding variants in EBF3 are involved in HADDS and simplex autism
Source: Hum Genomics. 2021 Jul 13;15:44. doi: 10.1186/s40246-021-00342-3 (PMC8278787; doi:10.1186/s40246-021-00342-3)
Supplement: Supplementary file 1 — Additional file 1: Table S1: Coordinates in the human genome (build 38) of VISTA enhancers driving expression in the brain. [file 40246_2021_342_MOESM1_ESM.xlsx]

## Sheet: Table_S1
chromosome	start	end	ID
chr16	86396481	86397120	hs1
chr16	80338696	80339858	hs4
chr16	78476711	78478047	hs12
chr16	72704669	72706250	hs20
chr16	72220667	72221926	hs22
chr16	55390504	55391826	hs23
chr16	55189273	55190371	hs26
chr16	54616686	54617970	hs37
chr16	54541966	54544013	hs43
chr16	51637270	51638128	hs71
chr16	51526285	51527014	hs74
chr16	51197210	51198451	hs76
chr16	51022400	51023681	hs79
chr16	48878905	48880233	hs101
chr7	20963661	20965131	hs110
chr7	42152129	42154039	hs111
chr9	973435	975288	hs112
chrX	24876218	24877967	hs118
chrX	24897265	24900155	hs119
chrX	24989762	24991464	hs121
chrX	24998950	25000639	hs122
chrX	25382107	25384217	hs123
chr13	71726717	71728802	hs137
chr13	71851655	71854203	hs138
chrX	25000754	25002415	hs145
chr2	44879788	44880514	hs149
chr16	51113101	51114731	hs152
chr16	53914289	53915934	hs155
chr16	52412138	52413325	hs161
chr2	163593634	163595248	hs170
chr1	87355938	87357399	hs174
chr15	36948604	36950297	hs181
chr9	126436121	126438460	hs186
chr3	71241267	71243433	hs187
chr5	91741071	91743082	hs191
chr3	181055851	181058014	hs192
chr1	50568874	50570617	hs194
chr8	105321302	105322631	hs195
chr1	50699523	50701114	hs200
chr1	213424621	213426181	hs204
chr3	137328702	137330429	hs209
chr3	137348780	137350083	hs210
chr6	51283870	51284912	hs217
chr7	114416792	114418592	hs218
chr10	129892822	129894584	hs232
chr11	31663809	31665336	hs234
chr9	81112208	81113463	hs240
chr2	173249643	173251205	hs242
chr2	174124009	174125635	hs244
chr2	176075342	176076682	hs246
chr4	104424418	104425738	hs260
chr5	3511864	3513285	hs261
chr5	77645011	77645571	hs262
chr5	87872597	87873616	hs266
chr5	87944125	87945828	hs267
chr5	88396337	88397448	hs268
chr5	91632795	91633409	hs269
chr5	93891279	93892616	hs271
chr1	44249748	44250457	hs277
chr5	171200986	171203014	hs278
chr6	41555486	41555939	hs281
chr6	97668209	97669067	hs282
chr7	1225518	1226682	hs293
chr7	26689078	26690183	hs296
chr7	97004270	97004991	hs298
chr9	8095553	8096166	hs304
chr9	16710538	16711186	hs307
chr9	78856831	78858198	hs312
chr9	79255707	79257309	hs313
chr9	123775439	123777650	hs314
chr10	75967103	75967860	hs320
chr1	87356110	87357227	hs322
chr1	88461113	88462825	hs327
chr10	125216753	125217434	hs330
chr13	94966210	94967565	hs341
chr14	29391323	29393142	hs342
chr14	35550818	35551792	hs348
chr15	36526820	36528494	hs355
chr15	57133046	57133760	hs357
chr17	36972050	36972645	hs363
chr18	25112452	25113676	hs367
chr18	25284789	25286493	hs369
chr18	37483519	37484565	hs371
chr18	55422394	55423848	hs376
chr2	7634262	7634939	hs388
chr2	59519242	59519857	hs394
chr2	60214360	60215380	hs399
chr2	104120060	104120907	hs401
chr2	144430532	144432245	hs407
chr1	10791513	10792116	hs408
chr2	155870069	155871093	hs411
chr2	156694502	156695440	hs413
chr2	161238384	161238940	hs416
chr2	172091151	172092324	hs422
chrX	82533435	82535122	hs426
chrX	140087220	140089386	hs427
chr14	25908166	25909597	hs428
chr19	30349392	30352629	hs430
chr14	30272544	30274420	hs433
chr3	62365051	62366043	hs434
chr3	62374191	62374894	hs435
chr7	35418941	35419912	hs472
chr20	31603913	31604751	hs480
chr10	75404806	75405881	hs484
chr13	94706009	94707763	hs488
chr22	38046133	38046872	hs492
chr10	90930264	90930917	hs495
chr2	121074842	121075741	hs522
chr4	1611752	1612379	hs526
chr9	17322202	17324373	hs529
chr13	27821824	27823399	hs532
chr5	3186325	3187812	hs533
chr13	70783961	70785375	hs540
chr2	44803430	44805600	hs541
chr1	243713165	243714591	hs545
chr7	13466582	13467651	hs550
chr2	172071791	172073521	hs553
chr9	81684295	81685202	hs556
chr4	111500646	111501749	hs559
chr10	129308258	129310478	hs562
chr6	98043953	98045362	hs563
chr11	31601275	31602571	hs565
chr14	29215690	29217538	hs566
chr6	98014076	98015433	hs567
chr2	145934720	145935715	hs568
chr15	37220473	37222356	hs572
chr2	157004589	157005897	hs573
chr13	67854985	67856394	hs575
chr6	100210036	100211515	hs576
chrX	82208791	82209567	hs582
chr18	37139423	37140757	hs590
chr14	36345096	36346731	hs592
chr14	37257135	37258143	hs593
chr10	74418007	74419242	hs595
chr15	37360582	37362259	hs599
chr5	3182104	3183157	hs603
chr12	17504798	17506074	hs605
chr12	16457111	16459002	hs607
chr2	146414436	146416234	hs609
chr12	111057593	111058448	hs611
chr1	90840005	90841658	hs612
chr13	71759384	71760856	hs619
chr14	98999863	99000807	hs622
chr15	57133830	57134754	hs623
chr16	49701188	49702538	hs625
chr17	39618232	39618735	hs627
chr9	159657	160780	hs628
chr8	37100333	37101205	hs631
chr20	2738562	2739143	hs632
chr18	78246820	78248476	hs634
chr3	158164514	158166174	hs636
chr2	163717497	163718948	hs640
chr9	113964156	113965533	hs641
chr9	23004731	23005790	hs643
chr7	18846348	18847607	hs644
chr2	171963843	171964792	hs646
chr2	145931482	145932531	hs649
chr3	137467122	137468024	hs653
chr3	148083228	148084382	hs654
chr10	129602684	129604015	hs656
chr7	70237245	70238629	hs658
chr15	66906636	66907796	hs660
chr12	16787774	16789388	hs661
chr2	156864116	156865074	hs662
chrX	140249968	140251211	hs667
chr8	91812531	91814390	hs669
chr1	97144935	97146185	hs671
chr10	118314527	118316184	hs672
chr2	143346313	143348075	hs675
chr6	97096735	97097883	hs676
chr18	47560919	47561703	hs679
chr4	84324438	84325402	hs680
chr4	54015055	54016288	hs687
chr20	20492309	20493556	hs688
chr2	62966720	62967794	hs690
chr11	15565495	15566768	hs692
chr8	52254170	52255276	hs698
chr10	129033193	129034911	hs699
chr7	21044723	21045841	hs701
chr2	104516357	104517372	hs702
chr14	36463945	36465327	hs704
chr1	3274017	3274864	hs705
chr4	83778858	83780112	hs712
chr7	114153490	114154507	hs720
chr9	81394601	81395951	hs722
chr10	128568604	128569741	hs737
chr8	77130335	77131965	hs742
chr10	76630832	76632117	hs748
chr7	13411295	13412094	hs749
chr5	3197751	3198828	hs754
chrX	137234647	137235712	hs755
chr13	105363248	105364577	hs759
chr1	163472151	163473052	hs762
chr1	63199548	63200451	hs764
chr9	79208382	79209752	hs765
chr18	79250009	79250795	hs775
chr2	60125379	60126467	hs779
chr8	22049915	22050771	hs781
chr8	22043578	22044815	hs782
chr7	10644691	10645732	hs793
chr13	94661598	94663187	hs796
chr12	16017656	16018890	hs798
chr7	9231678	9232728	hs799
chr7	22051744	22052939	hs807
chr5	158716416	158717717	hs813
chr7	14340002	14341115	hs816
chr9	125758713	125760374	hs818
chr15	36672618	36673897	hs828
chr15	37867306	37868806	hs830
chr2	67054125	67055408	hs831
chr4	66123762	66124648	hs840
chr10	117094613	117095732	hs841
chr4	14267209	14268300	hs842
chr7	20793009	20794283	hs844
chr4	42148074	42149047	hs847
chr16	51457888	51459114	hs848
chr18	39183799	39184827	hs851
chr9	13750116	13751399	hs852
chr5	87787195	87788935	hs853
chr11	31967627	31968476	hs855
chr2	174331315	174332386	hs860
chr11	31480488	31481610	hs863
chr6	50717531	50718524	hs865
chr2	105080753	105081700	hs868
chr11	121929063	121930463	hs872
chr9	130665168	130665841	hs876
chr13	70958905	70960063	hs882
chr11	16290047	16291335	hs883
chr4	180280406	180281376	hs886
chr12	24080950	24082700	hs895
chr9	37251210	37252226	hs901
chr4	144355661	144357567	hs906
chr8	98416253	98417204	hs908
chr20	21234152	21236594	hs914
chr13	78401880	78403203	hs915
chr2	236053955	236056213	hs921
chr4	110748103	110750012	hs930
chr10	117550972	117551947	hs935
chr18	65411026	65411603	hs947
chr5	92146639	92148732	hs952
chr2	174338535	174340167	hs953
chr7	114659656	114662023	hs956
chr2	60534269	60535938	hs957
chr7	114686857	114689717	hs966
chr12	103090564	103091741	hs967
chr2	104701122	104703398	hs969
chr5	92634455	92636327	hs971
chr2	59077839	59079758	hs975
chr6	97306167	97307637	hs978
chr12	17695177	17696413	hs980
chr4	112521234	112522374	hs981
chr9	126107167	126108655	hs987
chr2	104900279	104902032	hs990
chr12	17158850	17160825	hs993
chr12	103012346	103014376	hs998
chr7	114502077	114503472	hs999
chr1	38246403	38247845	hs1001
chr9	80066353	80067777	hs1004
chr10	100485085	100486577	hs1006
chr7	20958049	20959483	hs1007
chr18	78701276	78702723	hs1011
chr18	55032639	55033995	hs1013
chr9	126157395	126158153	hs1015
chr9	125883183	125884818	hs1017
chr7	20799224	20800776	hs1019
chr18	77784382	77786551	hs1020
chr5	159059112	159060490	hs1022
chr5	92977133	92978938	hs1024
chr2	72897601	72898962	hs1025
chr18	25164704	25166306	hs1027
chr9	125754655	125756093	hs1030
chr10	117549689	117551033	hs1032
chr6	97626215	97627846	hs1035
chr9	79395331	79396632	hs1041
chr3	147407359	147408549	hs1043
chr4	108610752	108612309	hs1050
chr6	18536397	18538036	hs1052
chr18	78721722	78723257	hs1056
chr5	93278156	93281138	hs1060
chr14	28756869	28758467	hs1064
chr2	63048560	63049968	hs1066
chr9	79609170	79611842	hs1078
chr5	92805804	92807830	hs1079
chr6	98454158	98456640	hs1081
chr11	31794904	31796873	hs1082
chr6	98641485	98643167	hs1085
chr20	40705542	40706419	hs1086
chr3	71104405	71105902	hs1092
chr2	103175870	103177361	hs1093
chr6	41592979	41594337	hs1100
chr2	103292900	103294763	hs1112
chr12	102977571	102978832	hs1114
chr3	148288712	148290023	hs1115
chr5	159081834	159083129	hs1117
chr9	81552436	81553261	hs1118
chr2	59249469	59250820	hs1119
chr6	98381984	98383173	hs1128
chr2	104416035	104417987	hs1131
chr1	38783085	38784457	hs1139
chr2	60627921	60629753	hs1142
chr1	87560180	87561520	hs1161
chr14	36504570	36505380	hs1166
chr14	29274168	29276675	hs1168
chr18	24656022	24657424	hs1169
chr5	93298996	93300770	hs1172
chr3	147660760	147662816	hs1173
chr6	19975926	19977282	hs1175
chr18	25036867	25038718	hs1180
chr18	77857617	77858906	hs1186
chr5	51095065	51096423	hs1187
chr21	32918474	32919807	hs1188
chr1	164836270	164837557	hs1191
chr7	114823742	114824407	hs1192
chr1	164634904	164636237	hs1202
chr3	148084570	148085799	hs1203
chr20	21507913	21509383	hs1205
chr2	66535383	66537956	hs1210
chr7	42213232	42214961	hs1213
chr14	56964169	56965628	hs1218
chr3	147933889	147935649	hs1224
chr7	21041182	21042467	hs1226
chr5	91975959	91977069	hs1227
chr1	164650801	164651927	hs1235
chr10	117830148	117831665	hs1236
chr16	10225972	10227019	hs1242
chr3	158057953	158060211	hs1251
chr5	174733171	174734831	hs1256
chr1	218034090	218035156	hs1257
chr9	95495577	95497123	hs1258
chr3	158061633	158063431	hs1262
chr16	52434617	52437850	hs1300
chr11	16401723	16404491	hs1301
chr6	112501111	112505123	hs1302
chr2	104051414	104054190	hs1303
chr21	16308841	16310481	hs1304
chr8	79962126	79964511	hs1305
chr7	127534332	127537492	hs1308
chr1	61452123	61454518	hs1309
chr6	170438007	170439776	hs1310
chr11	110130170	110132509	hs1311
chr5	30994176	30995940	hs1312
chr11	12843785	12846999	hs1314
chr6	9095101	9096752	hs1315
chr3	62420142	62422424	hs1316
chr8	76685772	76688410	hs1318
chr10	123067938	123070218	hs1319
chr15	96584824	96587064	hs1320
chr5	51172116	51174155	hs1321
chr1	198294432	198296612	hs1322
chr1	213324769	213327791	hs1324
chr7	25752283	25754662	hs1325
chr8	59028655	59031077	hs1326
chr5	2204343	2208266	hs1327
chr9	130478260	130479710	hs1328
chr8	28513350	28514343	hs1329
chr13	35198135	35200283	hs1330
chr1	167327717	167329809	hs1331
chr3	182240986	182243339	hs1332
chr13	35498777	35501835	hs1333
chr10	36765817	36768296	hs1334
chr6	22148345	22151158	hs1335
chr7	34058350	34060399	hs1336
chr9	89677569	89678974	hs1339
chr6	20866874	20870298	hs1340
chr12	97074925	97077311	hs1341
chr3	193943028	193944689	hs1344
chr5	107964162	107967275	hs1345
chr21	33093653	33096760	hs1346
chr9	3401031	3402562	hs1350
chr6	23179784	23181958	hs1352
chr12	103012107	103014512	hs1354
chr6	162855798	162858898	hs1358
chr9	81649280	81652035	hs1359
chr9	79661205	79663619	hs1360
chr4	152366503	152369365	hs1361
chr18	44742358	44746036	hs1362
chr18	45362398	45364170	hs1363
chr8	58255651	58257562	hs1364
chr6	38390914	38392308	hs1366
chr1	204454830	204455807	hs1368
chr5	125372642	125374699	hs1371
chr4	89995882	89999902	hs1374
chr5	124994956	124997237	hs1375
chr10	11679308	11680769	hs1382
chr16	61023614	61025721	hs1383
chr18	52046215	52048141	hs1384
chr2	3264425	3267078	hs1385
chr2	150326360	150328958	hs1386
chr3	63687152	63689110	hs1387
chr1	33363188	33365346	hs1388
chr4	125518677	125520859	hs1389
chr6	3349163	3352023	hs1391
chr13	42593235	42595461	hs1393
chr13	77831993	77833579	hs1394
chr3	158367861	158369043	hs1413
chr9	95512060	95513032	hs1417
chr7	155471352	155473114	hs1418
chr5	51558610	51560379	hs1419
chr7	70131993	70133277	hs1425
chr3	54983448	54984533	hs1436
chr4	94668294	94670308	hs1438
chr18	45588382	45590764	hs1440
chr1	61587761	61590236	hs1450
chr3	193959729	193962381	hs1453
chr14	76918298	76921354	hs1466
chr1	61579788	61582487	hs1484
chr11	1963842	1966142	hs1488
chr2	5409485	5412892	hs1496
chr12	66733324	66735950	hs1498
chr21	38989433	38991200	hs1516
chr14	29388724	29391342	hs1523
chr2	103737475	103740884	hs1526
chr2	8641264	8643461	hs1527
chr2	103961698	103964030	hs1529
chr9	78395963	78399187	hs1530
chr11	31874048	31877516	hs1531
chr12	17018777	17021842	hs1532
chr6	19718991	19722679	hs1533
chr2	104427824	104431054	hs1534
chr2	60270922	60274878	hs1535
chr18	55351447	55352813	hs1537
chr14	36441957	36445155	hs1538
chr14	29241679	29244134	hs1539
chr12	103011332	103015018	hs1540
chr3	194211571	194213668	hs1543
chr18	25464143	25466889	hs1544
chr4	108333184	108335877	hs1545
chr1	38370324	38372434	hs1546
chr21	32849146	32851638	hs1548
chr2	104848528	104851080	hs1553
chr2	103400188	103403366	hs1555
chr3	27992337	27994260	hs1557
chr22	45845035	45846420	hs1559
chr3	193771570	193773544	hs1563
chr6	97464949	97468106	hs1564
chr18	25852759	25854861	hs1566
chr10	35683964	35687004	hs1567
chr13	27744442	27745997	hs1568
chr12	113663390	113666000	hs1571
chr3	147845622	147848817	hs1573
chr12	406900	409490	hs1574
chr12	103177204	103179620	hs1575
chr5	92592138	92595317	hs1577
chr2	211390115	211392433	hs1578
chr14	56853946	56857601	hs1579
chr4	123462273	123465299	hs1582
chr9	78437288	78440904	hs1585
chr10	35636454	35638314	hs1588
chr9	97873936	97875680	hs1597
chr8	92058469	92061167	hs1599
chr7	25655417	25657996	hs1600
chr15	40091359	40093937	hs1611
chr1	9371068	9372775	hs1615
chr22	20420771	20424717	hs1620
chr7	5632287	5636913	hs1623
chr9	115465567	115468054	hs1625
chr7	91124580	91128765	hs1627
chr7	91136067	91139139	hs1628
chr11	116651165	116651910	hs1632
chr7	91147899	91151521	hs1633
chr18	27920941	27924250	hs1636
chr5	56600346	56603242	hs1638
chr11	126057160	126060423	hs1641
chr7	96245535	96248789	hs1642
chr5	125315470	125318494	hs1643
chr6	139886840	139890632	hs1644
chr3	115217483	115219382	hs1648
chr5	102663369	102668199	hs1649
chr18	21758991	21761961	hs1650
chr4	56053423	56057627	hs1651
chr12	113932321	113934251	hs1673
chr7	25493988	25497261	hs1677
chr21	26954008	26955434	hs1684
chr3	113092647	113097560	hs1685
chr15	93981345	93983913	hs1686
chr6	111550485	111555465	hs1690
chr1	18632177	18633790	hs1702
chr14	21703052	21705074	hs1705
chr9	97873936	97878227	hs1717
chr12	103220166	103221542	hs1723
chr16	73328910	73330393	hs1724
chr17	33750500	33751658	hs1725
chr18	51753004	51755110	hs1726
chr5	107573815	107575311	hs1734
chr8	27894923	27895834	hs1741
chr9	2240936	2242833	hs1743
chrX	124216977	124218737	hs1745
chrX	151239220	151240580	hs1746
chr11	65487233	65490923	hs1759
chr5	77845919	77849307	hs1783
chr14	57007426	57011372	hs1791
chr7	115811477	115814742	hs1798
chr8	105590637	105595180	hs1800
chr2	144582035	144583963	hs1802
chr7	122327474	122331024	hs1809
chr21	37855304	37856921	hs1811
chr5	172771670	172774006	hs1828
chr1	44034711	44037665	hs1857
chr11	8204499	8209136	hs1859
chr20	50689770	50692625	hs1860
chr2	170013097	170014655	hs1867
chr8	128975559	128976335	hs1877
chr1	156660457	156665492	hs1891
chr11	119889021	119892949	hs1915
chr2	240368562	240373577	hs1937
chr6	84051774	84053626	hs2063
chr6	52388930	52391414	hs2064
chr1	246305949	246308048	hs2070
chr1	10735049	10739184	hs2094
chr20	32976112	32981064	hs2101
chr1	236997312	237000217	hs2137
chr10	73964099	73967969	hs2142
chr11	19172537	19174989	hs2144
chr21	34334577	34338488	hs2174
chr7	151752947	151756627	hs2199
chr7	151756863	151760019	hs2200
chr9	136568507	136573895	hs2207
chr1	109253074	109256228	hs2216
chr10	78175813	78180338	hs2223
chr20	32524531	32529311	hs2225
chr15	31303587	31308005	hs2231
chr22	31623379	31627836	hs2240
chr11	10351197	10353153	hs2289
chr7	96136568	96137161	hs2313
chr7	69860882	69862698	hs2315
chr7	70266849	70269110	hs2318
chr6	100456252	100457191	hs2319
chr5	126008814	126010550	hs2325
chr10	43086364	43087440	hs2326
chr10	42951826	42953179	hs2327
chr21	37434074	37436355	hs2333
chr18	44714995	44717774	hs2335
chr18	44825520	44827924	hs2336
chr2	161370304	161372949	hs2337
chr9	127661222	127662040	hs2342
chr2	49971632	49975473	hs2343
chr10	42980637	42982237	hs2497
chr8	2032585	2038269	hs2514
chr11	95336602	95340141	hs2531
chr22	17784911	17788092	hs2543
chr20	22401875	22405162	hs2547
chr8	132412899	132415642	hs2563
chr3	157247166	157253098	hs2571
chr20	38691862	38693085	hs2620
Table S1: Coordinates in the human genome (build 38) of VISTA enhancers driving expression in the brain.
