# Supplementary material for: Coding and noncoding variants in EBF3 are involved in HADDS and simplex autism
Source: Hum Genomics. 2021 Jul 13;15:44. doi: 10.1186/s40246-021-00342-3 (PMC8278787; doi:10.1186/s40246-021-00342-3)
Supplement: Supplementary file 3 — Additional file 3: Table S7: should have the label "CNVs over hs737 in the morbidity map dataset. [file 40246_2021_342_MOESM3_ESM.xlsx]

## Sheet: Sheet1
Chromosome (hg38)	Window start	Window End	?	sampleset	Strand	CNV_start	CNV_end	color	Size
chr10	128529329	128792552	9874686	3	.	103383296	133589746	0,0,220	30206450	5.78903e+06
chr10	128529329	128792552	9893307	3	.	108032211	133620674	0,0,220	25588463
chr10	128529329	128792552	9889617	3	.	114662821	133589686	0,0,220	18926865
chr10	128529329	128792552	9872143	3	.	117888935	133589746	0,0,220	15700811
chr10	128529329	128792552	9888350	3	.	119241317	133589686	0,0,220	14348369
chr10	128529329	128792552	9892937	3	.	119273011	133620675	0,0,220	14347664
chr10	128529329	128792552	9868685	1	.	119514826	133589746	220,0,0	14074920
chr10	128529329	128792552	9864166	1	.	120063852	133589746	220,0,0	13525894
chr10	128529329	128792552	9882762	1	.	120414226	133589746	220,0,0	13175520
chr10	128529329	128792552	9872569	1	.	120523855	133589746	220,0,0	13065891
chr10	128529329	128792552	9860801	1	.	121268092	133589746	220,0,0	12321654
chr10	128529329	128792552	9883447	1	.	122032182	133589746	220,0,0	11557564
chr10	128529329	128792552	9896473	1	.	123205655	133620674	220,0,0	10415019
chr10	128529329	128792552	9871850	1	.	123434245	133589746	220,0,0	10155501
chr10	128529329	128792552	9864078	1	.	123985518	133589746	220,0,0	9604228
chr10	128529329	128792552	9878862	1	.	123985518	133589746	220,0,0	9604228
chr10	128529329	128792552	9869855	1	.	124233004	128999551	220,0,0	4766547
chr10	128529329	128792552	9889681	1	.	124471052	133589686	220,0,0	9118634
chr10	128529329	128792552	9910114	1	.	124521767	133620815	220,0,0	9099048
chr10	128529329	128792552	9904971	1	.	124521966	133620675	220,0,0	9098709
chr10	128529329	128792552	9879328	1	.	124982296	133589746	220,0,0	8607450
chr10	128529329	128792552	9898023	1	.	125233256	133620675	220,0,0	8387419
chr10	128529329	128792552	9909407	1	.	125392699	133398605	220,0,0	8005906
chr10	128529329	128792552	9897509	1	.	126148743	133620675	220,0,0	7471932
chr10	128529329	128792552	9879751	1	.	126177264	133589746	220,0,0	7412482
chr10	128529329	128792552	9868682	1	.	126502441	133589746	220,0,0	7087305
chr10	128529329	128792552	9880819	1	.	126614457	133589746	220,0,0	6975289
chr10	128529329	128792552	9889883	1	.	126977759	133589686	220,0,0	6611927
chr10	128529329	128792552	9888570	1	.	127129690	133589686	220,0,0	6459996
chr10	128529329	128792552	9895073	1	.	127141217	133620674	220,0,0	6479457
chr10	128529329	128792552	9881251	1	.	127297301	133589746	220,0,0	6292445
chr10	128529329	128792552	9910239	1	.	127968689	133620814	220,0,0	5652125
chr10	128529329	128622865	9878441	1	.	128461438	128622865	220,0,0	161427
chr10	128529329	128792552	9896789	1	.	128517734	133620674	220,0,0	5102940
