# Supplementary material for: Coding and noncoding variants in EBF3 are involved in HADDS and simplex autism
Source: Hum Genomics. 2021 Jul 13;15:44. doi: 10.1186/s40246-021-00342-3 (PMC8278787; doi:10.1186/s40246-021-00342-3)
Supplement: Supplementary file 4 — Additional file 4: Table S8: Protein-coding de novo mutations in EBF3 from Coe et al. 2019, Nature Genetics and Kaplanis et al. 2020, bioRxiv. [file 40246_2021_342_MOESM4_ESM.xlsx]

## Sheet: Sheet1
id	chrom	pos	ref	alt	publication	VEP_Consequence
DDD13k.06769	10	131761638	TTCTC	T	Kaplanis_et_al_bioRxiv	frameshift_variant
34290	10	131761677	AC	A	Kaplanis_et_al_bioRxiv	frameshift_variant
99762	10	131761750	GC	G	Kaplanis_et_al_bioRxiv	frameshift_variant
70092	10	131761632	TTC	T	Kaplanis_et_al_bioRxiv	frameshift_variant,splice_region_variant
DDD13k.03590	10	131671802	ATGTTGT	ATGT	Kaplanis_et_al_bioRxiv	inframe_deletion
14228.p1	10	131639146	C	G	Coe_et_al_2019	missense_variant
85793	10	131640527	C	T	Kaplanis_et_al_bioRxiv	missense_variant
84849	10	131671781	T	C	Kaplanis_et_al_bioRxiv	missense_variant
115794	10	131671784	G	T	Kaplanis_et_al_bioRxiv	missense_variant
42659	10	131676042	C	T	Kaplanis_et_al_bioRxiv	missense_variant
DDD13k.00302	10	131676089	C	A	Kaplanis_et_al_bioRxiv	missense_variant
rumc_patient_1459	10	131755537	G	C	Kaplanis_et_al_bioRxiv	missense_variant
DDD13k.07028	10	131755546	G	A	Kaplanis_et_al_bioRxiv	missense_variant
110872	10	131757201	C	A	Kaplanis_et_al_bioRxiv	missense_variant
5396	10	131757212	G	T	Kaplanis_et_al_bioRxiv	missense_variant
80366	10	131757214	G	A	Kaplanis_et_al_bioRxiv	missense_variant
56816	10	131757261	T	C	Kaplanis_et_al_bioRxiv	missense_variant
DDD13k.08252	10	131757261	T	C	Kaplanis_et_al_bioRxiv	missense_variant
19823	10	131761726	T	C	Kaplanis_et_al_bioRxiv	missense_variant
51243	10	131761731	T	G	Kaplanis_et_al_bioRxiv	missense_variant
DDD13k.01010	10	131761734	C	T	Kaplanis_et_al_bioRxiv	missense_variant
70569	10	131755588	C	A	Kaplanis_et_al_bioRxiv	missense_variant,splice_region_variant
DDD13k.00842	10	131755588	C	G	Kaplanis_et_al_bioRxiv	missense_variant,splice_region_variant
rumc_patient_1099	10	131666124		C	Kaplanis_et_al_bioRxiv	No_VEP_annotation
1921	10	131755591	C	T	Kaplanis_et_al_bioRxiv	splice_acceptor_variant
50775	10	131755520	A	G	Kaplanis_et_al_bioRxiv	splice_donor_variant
DDD13k.00484	10	131755521	C	T	Kaplanis_et_al_bioRxiv	splice_donor_variant
DDD13k.01083	10	131760434	C	T	Kaplanis_et_al_bioRxiv	splice_donor_variant
DDD13k.04219	10	131761205	C	G	Kaplanis_et_al_bioRxiv	splice_donor_variant
DDD13k.04478	10	131761629	A	C	Kaplanis_et_al_bioRxiv	splice_donor_variant
28537	10	131665504	G	A	Kaplanis_et_al_bioRxiv	stop_gained
106997	10	131665510	G	A	Kaplanis_et_al_bioRxiv	stop_gained
63744	10	131665510	G	A	Kaplanis_et_al_bioRxiv	stop_gained
rumc_patient_840	10	131665510	G	A	Kaplanis_et_al_bioRxiv	stop_gained
46003	10	131676052	G	A	Kaplanis_et_al_bioRxiv	stop_gained
65893	10	131761220	A	C	Kaplanis_et_al_bioRxiv	stop_gained
DDD13k.06269	10	131640537	C	T	Kaplanis_et_al_bioRxiv	synonymous_variant
84993	10	131646671	G	A	Kaplanis_et_al_bioRxiv	synonymous_variant
DDD13k.06736	10	131646680	C	T	Kaplanis_et_al_bioRxiv	synonymous_variant
Table S8: Protein-coding de novo mutations in EBF3 from Coe et al. 2019, Nature Genetics and Kaplanis et al. 2020, bioRxiv.
