# Supplementary material for: Coding and noncoding variants in EBF3 are involved in HADDS and simplex autism
Source: Hum Genomics. 2021 Jul 13;15:44. doi: 10.1186/s40246-021-00342-3 (PMC8278787; doi:10.1186/s40246-021-00342-3)
Supplement: Supplementary file 5 — Additional file 5: Table S9: should have the label "NDD genes bound by EBF3. [file 40246_2021_342_MOESM5_ESM.xlsx]

## Sheet: Sheet1
HGNC approved gene symbol	Promoter (5 kbp upstream) is bound by EBF3 in SK-N-SH cells	gene is multi-test correction significant for de novo variants in Coe et al. 2019, Nature Genetics (n = 10,927 NDD trios)	gene is multi-test correction significant for de novo variants in Kaplanis et al. 2020, bioRxiv (n = 31,058 NDD trios)
ADNP	yes	yes	yes
ARID1B	yes	yes	yes
ARID2	yes	yes	yes
ASXL1	yes	yes	yes
BRPF1	yes	yes	yes
CHD2	yes	yes	yes
CHD7	yes	yes	yes
CHD8	yes	yes	yes
CLTC	yes	yes	yes
CNKSR2	yes	yes	yes
DDX3X	yes	yes	yes
DNMT3A	yes	yes	yes
HIVEP2	yes	yes	yes
HNRNPD	yes	yes	yes
IRF2BPL	yes	yes	yes
ITPR1	yes	yes	yes
KAT6A	yes	yes	yes
KAT6B	yes	yes	yes
KDM5B	yes	yes	yes
KDM6B	yes	yes	yes
KIF1A	yes	yes	yes
KMT2A	yes	yes	yes
MEIS2	yes	yes	yes
MYT1L	yes	yes	yes
NFIX	yes	yes	yes
NR2F1	yes	yes	yes
PHIP	yes	yes	yes
POGZ	yes	yes	yes
PPP2R1A	yes	yes	yes
PTEN	yes	yes	yes
SMC1A	yes	yes	yes
SON	yes	yes	yes
SRCAP	yes	yes	yes
TAOK1	yes	yes	yes
TCF4	yes	yes	yes
TRAF7	yes	yes	yes
TRIP12	yes	yes	yes
U2AF2	yes	yes	yes
USP9X	yes	yes	yes
ZBTB18	yes	yes	yes
ZMYND11	yes	yes	yes
ZNF292	yes	yes	yes
ACTC1	yes	yes	no
AGAP2	yes	yes	no
AGO3	yes	yes	no
ANK2	yes	yes	no
C2orf42	yes	yes	no
CAPN15	yes	yes	no
CAPRIN1	yes	yes	no
CLASP1	yes	yes	no
FAM104A	yes	yes	no
FAM200A	yes	yes	no
FAM200B	yes	yes	no
HMGXB3	yes	yes	no
LEO1	yes	yes	no
MTF2	yes	yes	no
PHF3	yes	yes	no
RAB11A	yes	yes	no
RPL26	yes	yes	no
SKIDA1	yes	yes	no
SMC3	yes	yes	no
SNAPC5	yes	yes	no
SRSF11	yes	yes	no
SYNCRIP	yes	yes	no
TCF12	yes	yes	no
TMEM42	yes	yes	no
TNPO2	yes	yes	no
YWHAG	yes	yes	no
ABL1	yes	no	yes
ALG13	yes	no	yes
ARHGAP35	yes	no	yes
ARID1A	yes	no	yes
CACNA1G	yes	no	yes
CAMTA1	yes	no	yes
COG4	yes	no	yes
CSNK2B	yes	no	yes
DHDDS	yes	no	yes
DPF2	yes	no	yes
FBXW7	yes	no	yes
GATA3	yes	no	yes
HK1	yes	no	yes
KDM5C	yes	no	yes
KLF7	yes	no	yes
KMT2E	yes	no	yes
KMT5B	yes	no	yes
KRAS	yes	no	yes
LZTR1	yes	no	yes
MTOR	yes	no	yes
NACC1	yes	no	yes
NSD2	yes	no	yes
OGT	yes	no	yes
PIK3R1	yes	no	yes
PIK3R2	yes	no	yes
RHOBTB2	yes	no	yes
SAMD9	yes	no	yes
SETD1A	yes	no	yes
SHOC2	yes	no	yes
SOX11	yes	no	yes
UBTF	yes	no	yes
ZEB2	yes	no	yes
ZNF148	yes	no	yes
AAAS	yes	no	no
AAGAB	yes	no	no
AAMDC	yes	no	no
AANAT	yes	no	no
AAR2	yes	no	no
AARS2	yes	no	no
AARSD1	yes	no	no
AASDH	yes	no	no
ABCA12	yes	no	no
ABCB1	yes	no	no
ABCB10	yes	no	no
ABCB7	yes	no	no
ABCB8	yes	no	no
ABCC10	yes	no	no
ABCC3	yes	no	no
ABCD4	yes	no	no
ABCF3	yes	no	no
ABHD10	yes	no	no
ABHD13	yes	no	no
ABHD18	yes	no	no
ABHD2	yes	no	no
ABHD5	yes	no	no
ABHD8	yes	no	no
ABITRAM	yes	no	no
ABLIM1	yes	no	no
ABR	yes	no	no
ABT1	yes	no	no
ABTB2	yes	no	no
ACAA2	yes	no	no
ACAD8	yes	no	no
ACADM	yes	no	no
ACBD5	yes	no	no
ACCS	yes	no	no
ACLY	yes	no	no
ACO2	yes	no	no
ACOT11	yes	no	no
ACOX1	yes	no	no
ACSL3	yes	no	no
ACTL10	yes	no	no
ACTRT3	yes	no	no
ACVR1B	yes	no	no
ACY1	yes	no	no
ACYP1	yes	no	no
ADAM22	yes	no	no
ADAMTS1	yes	no	no
ADAMTS13	yes	no	no
ADAMTS9	yes	no	no
ADAMTSL2	yes	no	no
ADAR	yes	no	no
ADARB1	yes	no	no
ADAT2	yes	no	no
ADCY7	yes	no	no
ADCYAP1R1	yes	no	no
ADGRB3	yes	no	no
ADGRD1	yes	no	no
ADGRF3	yes	no	no
ADGRL2	yes	no	no
ADGRV1	yes	no	no
ADK	yes	no	no
ADM	yes	no	no
ADO	yes	no	no
ADPGK	yes	no	no
ADPRHL2	yes	no	no
ADPRM	yes	no	no
ADRA1B	yes	no	no
AFF1	yes	no	no
AGA	yes	no	no
AGAP3	yes	no	no
AGBL2	yes	no	no
AGBL5	yes	no	no
AGK	yes	no	no
AGO2	yes	no	no
AGRN	yes	no	no
AHCY	yes	no	no
AHI1	yes	no	no
AIDA	yes	no	no
AIG1	yes	no	no
AIMP2	yes	no	no
AIP	yes	no	no
AJM1	yes	no	no
AK3	yes	no	no
AK7	yes	no	no
AKAP11	yes	no	no
AKAP12	yes	no	no
AKAP8L	yes	no	no
AKT2	yes	no	no
ALCAM	yes	no	no
ALDH16A1	yes	no	no
ALDH3A2	yes	no	no
ALDOA	yes	no	no
ALG3	yes	no	no
ALG5	yes	no	no
ALK	yes	no	no
ALKBH2	yes	no	no
ALKBH4	yes	no	no
ALKBH8	yes	no	no
ALOXE3	yes	no	no
ALS2	yes	no	no
AMD1	yes	no	no
AMIGO3	yes	no	no
AMOTL1	yes	no	no
AMOTL2	yes	no	no
AMZ1	yes	no	no
ANG	yes	no	no
ANGPT2	yes	no	no
ANKFY1	yes	no	no
ANKIB1	yes	no	no
ANKMY1	yes	no	no
ANKRD13B	yes	no	no
ANKRD13D	yes	no	no
ANKRD17	yes	no	no
ANKRD18A	yes	no	no
ANKRD18B	yes	no	no
ANKRD24	yes	no	no
ANKRD28	yes	no	no
ANKRD37	yes	no	no
ANKRD39	yes	no	no
ANKRD40	yes	no	no
ANKRD44	yes	no	no
ANKRD45	yes	no	no
ANKRD54	yes	no	no
ANKS1A	yes	no	no
ANO3	yes	no	no
ANO6	yes	no	no
ANO8	yes	no	no
ANP32E	yes	no	no
ANTKMT	yes	no	no
AOPEP	yes	no	no
AP1G1	yes	no	no
AP1S2	yes	no	no
AP3S1	yes	no	no
AP3S2	yes	no	no
AP4B1	yes	no	no
AP4M1	yes	no	no
AP5M1	yes	no	no
AP5Z1	yes	no	no
APBA1	yes	no	no
APBA2	yes	no	no
API5	yes	no	no
APLNR	yes	no	no
APOBR	yes	no	no
APOM	yes	no	no
APRT	yes	no	no
APTX	yes	no	no
AQP1	yes	no	no
AQR	yes	no	no
ARAP3	yes	no	no
ARC	yes	no	no
ARF4	yes	no	no
ARF6	yes	no	no
ARFGAP2	yes	no	no
ARFIP1	yes	no	no
ARHGAP1	yes	no	no
ARHGAP26	yes	no	no
ARHGAP27	yes	no	no
ARHGAP4	yes	no	no
ARHGDIA	yes	no	no
ARHGEF1	yes	no	no
ARHGEF12	yes	no	no
ARHGEF17	yes	no	no
ARID3A	yes	no	no
ARID4B	yes	no	no
ARIH1	yes	no	no
ARIH2	yes	no	no
ARL1	yes	no	no
ARL10	yes	no	no
ARL14EP	yes	no	no
ARL2BP	yes	no	no
ARL5B	yes	no	no
ARL6IP1	yes	no	no
ARL6IP4	yes	no	no
ARL6IP5	yes	no	no
ARL6IP6	yes	no	no
ARL8B	yes	no	no
ARMC1	yes	no	no
ARMC12	yes	no	no
ARMH3	yes	no	no
ARMT1	yes	no	no
ARNT	yes	no	no
ARPC5L	yes	no	no
ARSJ	yes	no	no
ASAH1	yes	no	no
ASH2L	yes	no	no
ASIC3	yes	no	no
ASIC4	yes	no	no
ASPH	yes	no	no
ATAD1	yes	no	no
ATAD2	yes	no	no
ATAD2B	yes	no	no
ATAD3A	yes	no	no
ATE1	yes	no	no
ATF3	yes	no	no
ATF5	yes	no	no
ATF6	yes	no	no
ATF7IP	yes	no	no
ATG12	yes	no	no
ATG16L1	yes	no	no
ATG16L2	yes	no	no
ATG3	yes	no	no
ATG9B	yes	no	no
ATIC	yes	no	no
ATL3	yes	no	no
ATP2C1	yes	no	no
ATP5F1E	yes	no	no
ATP5MC2	yes	no	no
ATP5MPL	yes	no	no
ATP5PB	yes	no	no
ATP6V0B	yes	no	no
ATP6V1G2	yes	no	no
ATP6V1H	yes	no	no
ATPSCKMT	yes	no	no
ATR	yes	no	no
ATRAID	yes	no	no
ATXN2L	yes	no	no
ATXN7L3B	yes	no	no
AUP1	yes	no	no
AURKAIP1	yes	no	no
AVIL	yes	no	no
AVL9	yes	no	no
AVPI1	yes	no	no
AZI2	yes	no	no
B3GAT3	yes	no	no
B3GNT2	yes	no	no
B3GNT3	yes	no	no
B3GNT4	yes	no	no
B4GALT2	yes	no	no
B4GALT3	yes	no	no
B9D1	yes	no	no
BAALC	yes	no	no
BAG6	yes	no	no
BAHCC1	yes	no	no
BANF1	yes	no	no
BANP	yes	no	no
BARD1	yes	no	no
BAX	yes	no	no
BAZ1A	yes	no	no
BAZ1B	yes	no	no
BAZ2A	yes	no	no
BAZ2B	yes	no	no
BBS1	yes	no	no
BBS5	yes	no	no
BBX	yes	no	no
BCAR3	yes	no	no
BCAT1	yes	no	no
BCKDK	yes	no	no
BCL2	yes	no	no
BCL2L11	yes	no	no
BEGAIN	yes	no	no
BEX1	yes	no	no
BFAR	yes	no	no
BFSP1	yes	no	no
BHLHE40	yes	no	no
BHMG1	yes	no	no
BICD1	yes	no	no
BICD2	yes	no	no
BICRAL	yes	no	no
BIN1	yes	no	no
BIRC2	yes	no	no
BIRC5	yes	no	no
BIRC6	yes	no	no
BLOC1S1	yes	no	no
BLOC1S5	yes	no	no
BLOC1S6	yes	no	no
BMP2K	yes	no	no
BMPR2	yes	no	no
BMS1	yes	no	no
BNIP1	yes	no	no
BNIP2	yes	no	no
BOD1L1	yes	no	no
BORA	yes	no	no
BORCS7	yes	no	no
BPGM	yes	no	no
BRCA2	yes	no	no
BRD2	yes	no	no
BRD4	yes	no	no
BRF2	yes	no	no
BRIX1	yes	no	no
BRMS1L	yes	no	no
BROX	yes	no	no
BRWD1	yes	no	no
BSDC1	yes	no	no
BSG	yes	no	no
BTBD7	yes	no	no
BTK	yes	no	no
BUD31	yes	no	no
BZW2	yes	no	no
C11orf1	yes	no	no
C11orf45	yes	no	no
C11orf96	yes	no	no
C11orf98	yes	no	no
C12orf49	yes	no	no
C12orf57	yes	no	no
C12orf65	yes	no	no
C12orf73	yes	no	no
C14orf180	yes	no	no
C14orf93	yes	no	no
C16orf90	yes	no	no
C16orf91	yes	no	no
C16orf92	yes	no	no
C17orf49	yes	no	no
C17orf80	yes	no	no
C17orf99	yes	no	no
C18orf25	yes	no	no
C18orf32	yes	no	no
C19orf25	yes	no	no
C1D	yes	no	no
C1orf194	yes	no	no
C1orf232	yes	no	no
C1orf61	yes	no	no
C20orf141	yes	no	no
C22orf39	yes	no	no
C2CD5	yes	no	no
C2orf49	yes	no	no
C2orf69	yes	no	no
C2orf73	yes	no	no
C3orf18	yes	no	no
C3orf38	yes	no	no
C3orf67	yes	no	no
C5	yes	no	no
C5orf24	yes	no	no
C5orf51	yes	no	no
C6	yes	no	no
C6orf120	yes	no	no
C6orf47	yes	no	no
C6orf62	yes	no	no
C6orf89	yes	no	no
C7	yes	no	no
C7orf50	yes	no	no
C7orf61	yes	no	no
C8orf37	yes	no	no
C9orf116	yes	no	no
CACHD1	yes	no	no
CACNA1S	yes	no	no
CACNA2D1	yes	no	no
CACNB4	yes	no	no
CACNG8	yes	no	no
CAD	yes	no	no
CAGE1	yes	no	no
CALD1	yes	no	no
CALM1	yes	no	no
CALM2	yes	no	no
CAMK2D	yes	no	no
CAMTA2	yes	no	no
CAND1	yes	no	no
CAPN14	yes	no	no
CAPNS1	yes	no	no
CAPNS2	yes	no	no
CAPS2	yes	no	no
CARMIL1	yes	no	no
CASC4	yes	no	no
CASP6	yes	no	no
CASP9	yes	no	no
CAT	yes	no	no
CATSPERE	yes	no	no
CAVIN4	yes	no	no
CBFA2T2	yes	no	no
CBLL1	yes	no	no
CBLN2	yes	no	no
CBLN3	yes	no	no
CBR1	yes	no	no
CBX3	yes	no	no
CBX5	yes	no	no
CBX8	yes	no	no
CC2D2B	yes	no	no
CCAR1	yes	no	no
CCAR2	yes	no	no
CCBE1	yes	no	no
CCDC102B	yes	no	no
CCDC107	yes	no	no
CCDC112	yes	no	no
CCDC116	yes	no	no
CCDC142	yes	no	no
CCDC146	yes	no	no
CCDC159	yes	no	no
CCDC171	yes	no	no
CCDC18	yes	no	no
CCDC182	yes	no	no
CCDC191	yes	no	no
CCDC33	yes	no	no
CCDC34	yes	no	no
CCDC40	yes	no	no
CCDC47	yes	no	no
CCDC6	yes	no	no
CCDC77	yes	no	no
CCDC78	yes	no	no
CCDC85B	yes	no	no
CCDC88A	yes	no	no
CCDC92	yes	no	no
CCDC97	yes	no	no
CCDC9B	yes	no	no
CCND1	yes	no	no
CCNE2	yes	no	no
CCNG2	yes	no	no
CCNI	yes	no	no
CCNL2	yes	no	no
CCNT1	yes	no	no
CCNT2	yes	no	no
CCR10	yes	no	no
CCT5	yes	no	no
CCT6A	yes	no	no
CCT7	yes	no	no
CCT8	yes	no	no
CD2BP2	yes	no	no
CD59	yes	no	no
CD63	yes	no	no
CD68	yes	no	no
CDADC1	yes	no	no
CDAN1	yes	no	no
CDC14A	yes	no	no
CDC20	yes	no	no
CDC25B	yes	no	no
CDC25C	yes	no	no
CDC40	yes	no	no
CDC42EP3	yes	no	no
CDC42SE1	yes	no	no
CDC73	yes	no	no
CDH16	yes	no	no
CDHR2	yes	no	no
CDIP1	yes	no	no
CDIPT	yes	no	no
CDK12	yes	no	no
CDK2AP1	yes	no	no
CDK5RAP1	yes	no	no
CDK5RAP2	yes	no	no
CDK5RAP3	yes	no	no
CDK6	yes	no	no
CDKN2AIP	yes	no	no
CDKN2AIPNL	yes	no	no
CELF1	yes	no	no
CELSR3	yes	no	no
CEMIP	yes	no	no
CEMP1	yes	no	no
CENPF	yes	no	no
CENPM	yes	no	no
CENPO	yes	no	no
CENPP	yes	no	no
CEP120	yes	no	no
CEP126	yes	no	no
CEP135	yes	no	no
CEP170	yes	no	no
CEP63	yes	no	no
CEP76	yes	no	no
CEP78	yes	no	no
CEP95	yes	no	no
CERS3	yes	no	no
CFAP20	yes	no	no
CFAP410	yes	no	no
CFAP52	yes	no	no
CFAP53	yes	no	no
CFL1	yes	no	no
CGGBP1	yes	no	no
CHCHD10	yes	no	no
CHCHD4	yes	no	no
CHCHD5	yes	no	no
CHD1	yes	no	no
CHD1L	yes	no	no
CHD9	yes	no	no
CHGB	yes	no	no
CHL1	yes	no	no
CHM	yes	no	no
CHMP2A	yes	no	no
CHMP4A	yes	no	no
CHN1	yes	no	no
CHP1	yes	no	no
CHRNA3	yes	no	no
CHRNA9	yes	no	no
CHRNB1	yes	no	no
CHRNB4	yes	no	no
CHST11	yes	no	no
CIAO2A	yes	no	no
CIAPIN1	yes	no	no
CIC	yes	no	no
CILK1	yes	no	no
CIP2A	yes	no	no
CIPC	yes	no	no
CISD1	yes	no	no
CIZ1	yes	no	no
CKAP5	yes	no	no
CKLF-CMTM1	yes	no	no
CLCN2	yes	no	no
CLCN6	yes	no	no
CLDN12	yes	no	no
CLDN20	yes	no	no
CLDN4	yes	no	no
CLHC1	yes	no	no
CLIC4	yes	no	no
CLIP4	yes	no	no
CLK3	yes	no	no
CLN3	yes	no	no
CLNS1A	yes	no	no
CLPTM1	yes	no	no
CLRN2	yes	no	no
CLTA	yes	no	no
CLUAP1	yes	no	no
CLVS2	yes	no	no
CNIH3	yes	no	no
CNKSR3	yes	no	no
CNN2	yes	no	no
CNN3	yes	no	no
CNOT1	yes	no	no
CNOT10	yes	no	no
CNOT8	yes	no	no
CNPY4	yes	no	no
CNRIP1	yes	no	no
CNTN6	yes	no	no
CNTRL	yes	no	no
COA1	yes	no	no
COA5	yes	no	no
COA6	yes	no	no
COA7	yes	no	no
COASY	yes	no	no
COBLL1	yes	no	no
COG1	yes	no	no
COG8	yes	no	no
COIL	yes	no	no
COL4A2	yes	no	no
COLEC11	yes	no	no
COMMD1	yes	no	no
COMMD2	yes	no	no
COMMD5	yes	no	no
COMMD7	yes	no	no
COMMD8	yes	no	no
COMTD1	yes	no	no
COPB2	yes	no	no
COPS2	yes	no	no
COPS4	yes	no	no
COPS6	yes	no	no
COPS7A	yes	no	no
COPS7B	yes	no	no
COPS8	yes	no	no
COQ10B	yes	no	no
COQ3	yes	no	no
COQ4	yes	no	no
COQ5	yes	no	no
COQ8A	yes	no	no
COQ8B	yes	no	no
COQ9	yes	no	no
COX10	yes	no	no
COX11	yes	no	no
COX14	yes	no	no
COX16	yes	no	no
COX20	yes	no	no
COX7A2	yes	no	no
COX7A2L	yes	no	no
COX7B	yes	no	no
CPA4	yes	no	no
CPEB2	yes	no	no
CPED1	yes	no	no
CPO	yes	no	no
CPT2	yes	no	no
CPXM2	yes	no	no
CRABP2	yes	no	no
CRBN	yes	no	no
CRCP	yes	no	no
CREB3	yes	no	no
CREB3L2	yes	no	no
CREB5	yes	no	no
CREBL2	yes	no	no
CREBZF	yes	no	no
CRELD1	yes	no	no
CRIP1	yes	no	no
CRIPT	yes	no	no
CRISPLD1	yes	no	no
CRK	yes	no	no
CRLS1	yes	no	no
CROT	yes	no	no
CRY1	yes	no	no
CRY2	yes	no	no
CRYBA1	yes	no	no
CRYBA2	yes	no	no
CRYBA4	yes	no	no
CRYZ	yes	no	no
CS	yes	no	no
CSGALNACT2	yes	no	no
CSKMT	yes	no	no
CSNK1G1	yes	no	no
CSRNP1	yes	no	no
CSRP2	yes	no	no
CSTF3	yes	no	no
CTDNEP1	yes	no	no
CTDSP1	yes	no	no
CTDSPL2	yes	no	no
CTHRC1	yes	no	no
CTNNA1	yes	no	no
CTR9	yes	no	no
CTSA	yes	no	no
CTXN1	yes	no	no
CUEDC2	yes	no	no
CUL4A	yes	no	no
CUL4B	yes	no	no
CUL7	yes	no	no
CUTC	yes	no	no
CWC27	yes	no	no
CX3CL1	yes	no	no
CYB561	yes	no	no
CYB561A3	yes	no	no
CYB5A	yes	no	no
CYB5D1	yes	no	no
CYB5D2	yes	no	no
CYGB	yes	no	no
CYP1B1	yes	no	no
CYP20A1	yes	no	no
CYP51A1	yes	no	no
CYREN	yes	no	no
CYSTM1	yes	no	no
CYTH1	yes	no	no
DAB2IP	yes	no	no
DACH1	yes	no	no
DALRD3	yes	no	no
DAOA	yes	no	no
DAPK1	yes	no	no
DBH	yes	no	no
DBNDD1	yes	no	no
DCAF11	yes	no	no
DCAF17	yes	no	no
DCAF6	yes	no	no
DCAF7	yes	no	no
DCLRE1A	yes	no	no
DCLRE1B	yes	no	no
DCP1A	yes	no	no
DCPS	yes	no	no
DCT	yes	no	no
DCTN5	yes	no	no
DDA1	yes	no	no
DDB1	yes	no	no
DDB2	yes	no	no
DDC	yes	no	no
DDHD2	yes	no	no
DDIT3	yes	no	no
DDR2	yes	no	no
DDX1	yes	no	no
DDX18	yes	no	no
DDX19B	yes	no	no
DDX20	yes	no	no
DDX39B	yes	no	no
DDX42	yes	no	no
DDX46	yes	no	no
DDX47	yes	no	no
DDX5	yes	no	no
DDX55	yes	no	no
DDX60	yes	no	no
DEDD	yes	no	no
DEGS1	yes	no	no
DELE1	yes	no	no
DENND3	yes	no	no
DENND4B	yes	no	no
DEPDC1B	yes	no	no
DERL2	yes	no	no
DGKD	yes	no	no
DHFR2	yes	no	no
DHPS	yes	no	no
DHTKD1	yes	no	no
DHX16	yes	no	no
DHX33	yes	no	no
DHX40	yes	no	no
DHX8	yes	no	no
DIABLO	yes	no	no
DIPK1A	yes	no	no
DIS3L2	yes	no	no
DISC1	yes	no	no
DISP3	yes	no	no
DKK1	yes	no	no
DLC1	yes	no	no
DLG2	yes	no	no
DLST	yes	no	no
DMTF1	yes	no	no
DMXL1	yes	no	no
DMXL2	yes	no	no
DNAAF5	yes	no	no
DNAH2	yes	no	no
DNAH8	yes	no	no
DNAJA2	yes	no	no
DNAJB1	yes	no	no
DNAJB2	yes	no	no
DNAJB8	yes	no	no
DNAJB9	yes	no	no
DNAJC14	yes	no	no
DNAJC15	yes	no	no
DNAJC16	yes	no	no
DNAJC2	yes	no	no
DNAJC25	yes	no	no
DNAJC25-GNG10	yes	no	no
DNAJC27	yes	no	no
DNAJC4	yes	no	no
DNAJC7	yes	no	no
DNAJC9	yes	no	no
DNLZ	yes	no	no
DNM2	yes	no	no
DNMT1	yes	no	no
DOCK10	yes	no	no
DOCK4	yes	no	no
DOK1	yes	no	no
DOK4	yes	no	no
DOP1A	yes	no	no
DPEP2	yes	no	no
DPH7	yes	no	no
DPP3	yes	no	no
DPP9	yes	no	no
DPY19L4	yes	no	no
DPYSL5	yes	no	no
DQX1	yes	no	no
DRAP1	yes	no	no
DRG2	yes	no	no
DRGX	yes	no	no
DST	yes	no	no
DSTYK	yes	no	no
DTL	yes	no	no
DTNA	yes	no	no
DTWD1	yes	no	no
DTX3	yes	no	no
DTX3L	yes	no	no
DUSP1	yes	no	no
DUSP12	yes	no	no
DUSP2	yes	no	no
DUSP23	yes	no	no
DUSP26	yes	no	no
DUSP28	yes	no	no
DUSP4	yes	no	no
DUSP5	yes	no	no
DUSP6	yes	no	no
DXO	yes	no	no
DZANK1	yes	no	no
DZIP3	yes	no	no
E2F3	yes	no	no
E2F6	yes	no	no
EAF1	yes	no	no
EAPP	yes	no	no
EARS2	yes	no	no
EBAG9	yes	no	no
ECD	yes	no	no
ECE1	yes	no	no
ECHDC1	yes	no	no
ECI1	yes	no	no
EDC4	yes	no	no
EEF1A1	yes	no	no
EEF1AKMT2	yes	no	no
EEF1AKMT4	yes	no	no
EEF1AKMT4-ECE2	yes	no	no
EEF1B2	yes	no	no
EEF2	yes	no	no
EEF2K	yes	no	no
EEFSEC	yes	no	no
EFCAB2	yes	no	no
EFCAB7	yes	no	no
EFNA4	yes	no	no
EFNA5	yes	no	no
EFNB3	yes	no	no
EGFR	yes	no	no
EGLN3	yes	no	no
EGR1	yes	no	no
EGR3	yes	no	no
EHBP1	yes	no	no
EHD3	yes	no	no
EID1	yes	no	no
EIF1AD	yes	no	no
EIF2A	yes	no	no
EIF2B4	yes	no	no
EIF2B5	yes	no	no
EIF2D	yes	no	no
EIF2S2	yes	no	no
EIF2S3	yes	no	no
EIF3B	yes	no	no
EIF3D	yes	no	no
EIF3E	yes	no	no
EIF3F	yes	no	no
EIF3G	yes	no	no
EIF3J	yes	no	no
EIF3L	yes	no	no
EIF4A1	yes	no	no
EIF4A2	yes	no	no
EIF4E	yes	no	no
EIF4E2	yes	no	no
EIF4ENIF1	yes	no	no
EIF4G2	yes	no	no
EIF5	yes	no	no
ELAVL2	yes	no	no
ELAVL3	yes	no	no
ELAVL4	yes	no	no
ELF1	yes	no	no
ELF2	yes	no	no
ELK4	yes	no	no
ELMO1	yes	no	no
ELMOD2	yes	no	no
ELOVL5	yes	no	no
ELP1	yes	no	no
ELP2	yes	no	no
ELP5	yes	no	no
ELP6	yes	no	no
EMB	yes	no	no
EMG1	yes	no	no
EMILIN1	yes	no	no
EML3	yes	no	no
EML6	yes	no	no
ENC1	yes	no	no
ENG	yes	no	no
ENTPD6	yes	no	no
EOGT	yes	no	no
EPB41L5	yes	no	no
EPC1	yes	no	no
EPDR1	yes	no	no
EPHB4	yes	no	no
EPHX2	yes	no	no
EPM2AIP1	yes	no	no
EPN1	yes	no	no
EPOR	yes	no	no
EPRS1	yes	no	no
ERBB2	yes	no	no
ERC1	yes	no	no
ERCC1	yes	no	no
ERCC3	yes	no	no
ERCC5	yes	no	no
ERCC6L2	yes	no	no
ERG28	yes	no	no
ERH	yes	no	no
ERI2	yes	no	no
ERLIN1	yes	no	no
ESRRG	yes	no	no
ETFA	yes	no	no
ETS1	yes	no	no
ETV6	yes	no	no
EWSR1	yes	no	no
EXD1	yes	no	no
EXOC5	yes	no	no
EXOSC4	yes	no	no
EXOSC6	yes	no	no
EXOSC8	yes	no	no
EXTL2	yes	no	no
EYA1	yes	no	no
F8	yes	no	no
FAAP20	yes	no	no
FADS1	yes	no	no
FADS2	yes	no	no
FAIM	yes	no	no
FAM104B	yes	no	no
FAM110D	yes	no	no
FAM124A	yes	no	no
FAM133B	yes	no	no
FAM135A	yes	no	no
FAM13C	yes	no	no
FAM149B1	yes	no	no
FAM163B	yes	no	no
FAM168A	yes	no	no
FAM181B	yes	no	no
FAM189B	yes	no	no
FAM219A	yes	no	no
FAM221A	yes	no	no
FAM227B	yes	no	no
FAM3C	yes	no	no
FAM53C	yes	no	no
FAM76A	yes	no	no
FAM89B	yes	no	no
FAM98B	yes	no	no
FAN1	yes	no	no
FAR1	yes	no	no
FASN	yes	no	no
FASTK	yes	no	no
FASTKD3	yes	no	no
FBF1	yes	no	no
FBLIM1	yes	no	no
FBLN2	yes	no	no
FBXL17	yes	no	no
FBXL19	yes	no	no
FBXO22	yes	no	no
FBXO3	yes	no	no
FBXO31	yes	no	no
FBXO36	yes	no	no
FBXO4	yes	no	no
FBXO44	yes	no	no
FBXO46	yes	no	no
FBXO5	yes	no	no
FBXO9	yes	no	no
FBXW8	yes	no	no
FBXW9	yes	no	no
FCHSD2	yes	no	no
FDXACB1	yes	no	no
FEM1B	yes	no	no
FEN1	yes	no	no
FER	yes	no	no
FER1L5	yes	no	no
FERMT2	yes	no	no
FEV	yes	no	no
FGF11	yes	no	no
FGFR1OP2	yes	no	no
FGL1	yes	no	no
FHL2	yes	no	no
FIBP	yes	no	no
FILIP1	yes	no	no
FIZ1	yes	no	no
FKBP14	yes	no	no
FKBP2	yes	no	no
FKBP5	yes	no	no
FKBP7	yes	no	no
FLAD1	yes	no	no
FLCN	yes	no	no
FLII	yes	no	no
FLNC	yes	no	no
FLRT1	yes	no	no
FMC1	yes	no	no
FMC1-LUC7L2	yes	no	no
FMN1	yes	no	no
FNDC3B	yes	no	no
FNIP1	yes	no	no
FNTA	yes	no	no
FNTB	yes	no	no
FOXJ3	yes	no	no
FOXRED1	yes	no	no
FRA10AC1	yes	no	no
FRAT2	yes	no	no
FRG1	yes	no	no
FRMD3	yes	no	no
FRMD4A	yes	no	no
FRMD6	yes	no	no
FRMD8	yes	no	no
FRS2	yes	no	no
FSCN1	yes	no	no
FTH1	yes	no	no
FUCA2	yes	no	no
FUS	yes	no	no
FUT10	yes	no	no
FUT8	yes	no	no
FUZ	yes	no	no
FYN	yes	no	no
FZD1	yes	no	no
G3BP2	yes	no	no
G6PC3	yes	no	no
GAB2	yes	no	no
GABARAP	yes	no	no
GADD45A	yes	no	no
GAL3ST1	yes	no	no
GALE	yes	no	no
GALK1	yes	no	no
GALK2	yes	no	no
GALNT4	yes	no	no
GAP43	yes	no	no
GAPDH	yes	no	no
GAPVD1	yes	no	no
GAREM1	yes	no	no
GARNL3	yes	no	no
GARS1	yes	no	no
GART	yes	no	no
GAS1	yes	no	no
GAS8	yes	no	no
GATA2	yes	no	no
GATA4	yes	no	no
GATAD1	yes	no	no
GATAD2A	yes	no	no
GATD3A	yes	no	no
GBA	yes	no	no
GBP4	yes	no	no
GCC2	yes	no	no
GCLC	yes	no	no
GDAP1	yes	no	no
GDF9	yes	no	no
GEM	yes	no	no
GEMIN5	yes	no	no
GEN1	yes	no	no
GFER	yes	no	no
GFI1B	yes	no	no
GFM2	yes	no	no
GFRA3	yes	no	no
GGA1	yes	no	no
GGPS1	yes	no	no
GGT5	yes	no	no
GID8	yes	no	no
GIN1	yes	no	no
GINS3	yes	no	no
GIT1	yes	no	no
GLB1	yes	no	no
GLB1L	yes	no	no
GLCCI1	yes	no	no
GLDN	yes	no	no
GLIPR1L1	yes	no	no
GLRA1	yes	no	no
GLRX5	yes	no	no
GLT8D1	yes	no	no
GLT8D2	yes	no	no
GLUL	yes	no	no
GLYATL2	yes	no	no
GNAI2	yes	no	no
GNG8	yes	no	no
GNL2	yes	no	no
GOLGA1	yes	no	no
GOLGA4	yes	no	no
GOLGA8B	yes	no	no
GOLIM4	yes	no	no
GON4L	yes	no	no
GON7	yes	no	no
GORASP2	yes	no	no
GOT2	yes	no	no
GPAA1	yes	no	no
GPATCH1	yes	no	no
GPATCH2L	yes	no	no
GPATCH8	yes	no	no
GPBAR1	yes	no	no
GPBP1	yes	no	no
GPC6	yes	no	no
GPCPD1	yes	no	no
GPER1	yes	no	no
GPM6B	yes	no	no
GPN3	yes	no	no
GPR1	yes	no	no
GPR108	yes	no	no
GPR146	yes	no	no
GPR148	yes	no	no
GPR155	yes	no	no
GPR35	yes	no	no
GPR68	yes	no	no
GPR75	yes	no	no
GPR75-ASB3	yes	no	no
GPSM1	yes	no	no
GPSM3	yes	no	no
GRAMD4	yes	no	no
GRIN2D	yes	no	no
GRIP2	yes	no	no
GRIPAP1	yes	no	no
GRK6	yes	no	no
GRM7	yes	no	no
GRN	yes	no	no
GRWD1	yes	no	no
GSDME	yes	no	no
GSE1	yes	no	no
GSK3A	yes	no	no
GSK3B	yes	no	no
GSPT1	yes	no	no
GSTA4	yes	no	no
GSTCD	yes	no	no
GSTM4	yes	no	no
GSTP1	yes	no	no
GTF2B	yes	no	no
GTF2E1	yes	no	no
GTF2I	yes	no	no
GTF3C2	yes	no	no
GTF3C3	yes	no	no
GTF3C5	yes	no	no
GTF3C6	yes	no	no
GTPBP2	yes	no	no
GTPBP3	yes	no	no
GTPBP4	yes	no	no
GTPBP8	yes	no	no
GUCA2A	yes	no	no
GUCD1	yes	no	no
GUSB	yes	no	no
GYG1	yes	no	no
H1-10	yes	no	no
H1-2	yes	no	no
H2AC15	yes	no	no
H2AC17	yes	no	no
H2AC6	yes	no	no
H2AC7	yes	no	no
H2AC8	yes	no	no
H2AX	yes	no	no
H2BC11	yes	no	no
H2BC12	yes	no	no
H2BC13	yes	no	no
H2BC14	yes	no	no
H2BC15	yes	no	no
H2BC17	yes	no	no
H2BC21	yes	no	no
H2BC3	yes	no	no
H2BC5	yes	no	no
H2BC7	yes	no	no
H2BC8	yes	no	no
H2BC9	yes	no	no
H2BU1	yes	no	no
H3-3B	yes	no	no
H3C10	yes	no	no
H3C12	yes	no	no
H3C3	yes	no	no
H3C4	yes	no	no
H3C6	yes	no	no
H3C7	yes	no	no
H4C2	yes	no	no
H4C3	yes	no	no
H4C4	yes	no	no
H4C5	yes	no	no
H4C7	yes	no	no
H4C8	yes	no	no
H4C9	yes	no	no
H6PD	yes	no	no
HACD1	yes	no	no
HACD3	yes	no	no
HAND1	yes	no	no
HAND2	yes	no	no
HAPLN2	yes	no	no
HAUS2	yes	no	no
HAUS6	yes	no	no
HBP1	yes	no	no
HCFC1R1	yes	no	no
HCFC2	yes	no	no
HDAC9	yes	no	no
HDGFL3	yes	no	no
HDLBP	yes	no	no
HDX	yes	no	no
HECTD2	yes	no	no
HECTD3	yes	no	no
HELQ	yes	no	no
HEMK1	yes	no	no
HES1	yes	no	no
HES4	yes	no	no
HES6	yes	no	no
HES7	yes	no	no
HEXA	yes	no	no
HEXIM1	yes	no	no
HEXIM2	yes	no	no
HEY1	yes	no	no
HIBADH	yes	no	no
HIBCH	yes	no	no
HIF1A	yes	no	no
HIF1AN	yes	no	no
HILPDA	yes	no	no
HINT1	yes	no	no
HIP1	yes	no	no
HIPK1	yes	no	no
HIRA	yes	no	no
HIRIP3	yes	no	no
HIVEP1	yes	no	no
HLTF	yes	no	no
HMBOX1	yes	no	no
HMBS	yes	no	no
HMG20A	yes	no	no
HMGB1	yes	no	no
HMGB2	yes	no	no
HMGN3	yes	no	no
HMGN4	yes	no	no
HMGXB4	yes	no	no
HNF4G	yes	no	no
HNRNPA0	yes	no	no
HNRNPA2B1	yes	no	no
HNRNPAB	yes	no	no
HNRNPF	yes	no	no
HNRNPH3	yes	no	no
HNRNPL	yes	no	no
HNRNPLL	yes	no	no
HNRNPR	yes	no	no
HNRNPUL2	yes	no	no
HOMEZ	yes	no	no
HOTS	yes	no	no
HOXC5	yes	no	no
HOXD8	yes	no	no
HOXD9	yes	no	no
HPCAL1	yes	no	no
HSD17B11	yes	no	no
HSD17B14	yes	no	no
HSDL2	yes	no	no
HSP90AA1	yes	no	no
HSPA12A	yes	no	no
HSPA1A	yes	no	no
HSPA1B	yes	no	no
HSPA1L	yes	no	no
HSPA4	yes	no	no
HSPA5	yes	no	no
HSPA9	yes	no	no
HSPB1	yes	no	no
HSPB6	yes	no	no
HSPD1	yes	no	no
HSPE1	yes	no	no
HSPE1-MOB4	yes	no	no
HSPH1	yes	no	no
HTR2B	yes	no	no
HTR3B	yes	no	no
HUS1	yes	no	no
HVCN1	yes	no	no
HYI	yes	no	no
ICA1	yes	no	no
ICA1L	yes	no	no
ICAM2	yes	no	no
ID1	yes	no	no
ID2	yes	no	no
ID3	yes	no	no
IDH1	yes	no	no
IDI1	yes	no	no
IER2	yes	no	no
IER5L	yes	no	no
IFFO1	yes	no	no
IFNLR1	yes	no	no
IFRD1	yes	no	no
IFT22	yes	no	no
IFT52	yes	no	no
IGF2BP3	yes	no	no
IGFBP2	yes	no	no
IGFBP5	yes	no	no
IGHMBP2	yes	no	no
IKBKB	yes	no	no
IL1R1	yes	no	no
IL23A	yes	no	no
IL4I1	yes	no	no
IL6ST	yes	no	no
ILF2	yes	no	no
ING1	yes	no	no
ING5	yes	no	no
INHBC	yes	no	no
INKA2	yes	no	no
INO80	yes	no	no
INO80B	yes	no	no
INO80C	yes	no	no
INO80D	yes	no	no
INO80E	yes	no	no
INPP5K	yes	no	no
INPPL1	yes	no	no
INSM2	yes	no	no
INSR	yes	no	no
INSRR	yes	no	no
INSYN1	yes	no	no
INSYN2B	yes	no	no
INTS12	yes	no	no
INTS13	yes	no	no
INTS14	yes	no	no
INTS4	yes	no	no
INTS5	yes	no	no
INTS9	yes	no	no
IPO4	yes	no	no
IPP	yes	no	no
IPPK	yes	no	no
IQCH	yes	no	no
IQGAP2	yes	no	no
IRF1	yes	no	no
IRF2BP2	yes	no	no
IRF6	yes	no	no
IRF9	yes	no	no
ISL1	yes	no	no
IST1	yes	no	no
ITFG1	yes	no	no
ITGA1	yes	no	no
ITGA3	yes	no	no
ITGA7	yes	no	no
ITGAV	yes	no	no
ITGB2	yes	no	no
ITGB3BP	yes	no	no
ITGB8	yes	no	no
ITPKC	yes	no	no
ITPR2	yes	no	no
IWS1	yes	no	no
IZUMO4	yes	no	no
JADE1	yes	no	no
JMJD1C	yes	no	no
JMJD4	yes	no	no
JMJD6	yes	no	no
JOSD2	yes	no	no
JUN	yes	no	no
JUNB	yes	no	no
KANSL1L	yes	no	no
KANSL3	yes	no	no
KAT14	yes	no	no
KAT5	yes	no	no
KATNAL1	yes	no	no
KAZN	yes	no	no
KBTBD11	yes	no	no
KBTBD4	yes	no	no
KBTBD7	yes	no	no
KCNH2	yes	no	no
KCNIP1	yes	no	no
KCNK16	yes	no	no
KCNK2	yes	no	no
KCNT2	yes	no	no
KCTD1	yes	no	no
KCTD2	yes	no	no
KCTD7	yes	no	no
KDELR2	yes	no	no
KDM1A	yes	no	no
KDM3A	yes	no	no
KDM5A	yes	no	no
KDSR	yes	no	no
KEAP1	yes	no	no
KHK	yes	no	no
KHNYN	yes	no	no
KIAA0319L	yes	no	no
KIAA0586	yes	no	no
KIAA1324	yes	no	no
KIAA1522	yes	no	no
KIF18A	yes	no	no
KIF21A	yes	no	no
KIF22	yes	no	no
KIF26A	yes	no	no
KIF2C	yes	no	no
KIF6	yes	no	no
KIF9	yes	no	no
KLC1	yes	no	no
KLF6	yes	no	no
KLF9	yes	no	no
KLHDC10	yes	no	no
KLHDC2	yes	no	no
KLHL18	yes	no	no
KLHL20	yes	no	no
KLHL32	yes	no	no
KPNA2	yes	no	no
KPNA4	yes	no	no
KPNB1	yes	no	no
KPTN	yes	no	no
KRIT1	yes	no	no
KRT15	yes	no	no
KRT19	yes	no	no
KRT8	yes	no	no
KRT80	yes	no	no
KRTCAP2	yes	no	no
LACC1	yes	no	no
LACTB2	yes	no	no
LAMA3	yes	no	no
LAMA5	yes	no	no
LAMB1	yes	no	no
LAMC1	yes	no	no
LAMTOR2	yes	no	no
LANCL2	yes	no	no
LARP1	yes	no	no
LARS1	yes	no	no
LASP1	yes	no	no
LATS1	yes	no	no
LBX2	yes	no	no
LDAH	yes	no	no
LDB1	yes	no	no
LDHA	yes	no	no
LDHB	yes	no	no
LETM2	yes	no	no
LETMD1	yes	no	no
LFNG	yes	no	no
LGALS3	yes	no	no
LGALS3BP	yes	no	no
LIF	yes	no	no
LIFR	yes	no	no
LIG4	yes	no	no
LIMA1	yes	no	no
LIMCH1	yes	no	no
LIMS1	yes	no	no
LIN28A	yes	no	no
LIN28B	yes	no	no
LIN54	yes	no	no
LINGO1	yes	no	no
LINGO2	yes	no	no
LINGO3	yes	no	no
LITAF	yes	no	no
LIX1	yes	no	no
LIX1L	yes	no	no
LLPH	yes	no	no
LMBR1	yes	no	no
LMCD1	yes	no	no
LMNA	yes	no	no
LMNB1	yes	no	no
LMNTD1	yes	no	no
LMO1	yes	no	no
LNPEP	yes	no	no
LNX1	yes	no	no
LOC100129697	yes	no	no
LOC100996842	yes	no	no
LOC114841035	yes	no	no
LOC283710	yes	no	no
LOC730183	yes	no	no
LOXL1	yes	no	no
LOXL3	yes	no	no
LPCAT3	yes	no	no
LPIN1	yes	no	no
LPXN	yes	no	no
LRGUK	yes	no	no
LRPPRC	yes	no	no
LRR1	yes	no	no
LRRC2	yes	no	no
LRRC29	yes	no	no
LRRC32	yes	no	no
LRRC37A3	yes	no	no
LRRC40	yes	no	no
LRRC57	yes	no	no
LRRC59	yes	no	no
LRRC8B	yes	no	no
LRRN3	yes	no	no
LRRN4	yes	no	no
LRSAM1	yes	no	no
LRWD1	yes	no	no
LSG1	yes	no	no
LSM12	yes	no	no
LSM2	yes	no	no
LSM5	yes	no	no
LTA4H	yes	no	no
LTO1	yes	no	no
LUC7L2	yes	no	no
LUM	yes	no	no
LYL1	yes	no	no
LYN	yes	no	no
LYPD6B	yes	no	no
LYSMD1	yes	no	no
LZIC	yes	no	no
LZTS2	yes	no	no
MAATS1	yes	no	no
MAB21L1	yes	no	no
MAD1L1	yes	no	no
MAD2L2	yes	no	no
MAEA	yes	no	no
MAFG	yes	no	no
MAGED1	yes	no	no
MAGEF1	yes	no	no
MAGI2	yes	no	no
MAGI3	yes	no	no
MAGT1	yes	no	no
MAML1	yes	no	no
MAN2B1	yes	no	no
MAN2C1	yes	no	no
MANBAL	yes	no	no
MAP11	yes	no	no
MAP2	yes	no	no
MAP3K10	yes	no	no
MAP3K12	yes	no	no
MAP3K13	yes	no	no
MAP3K14	yes	no	no
MAP3K3	yes	no	no
MAP3K7CL	yes	no	no
MAP4	yes	no	no
MAPK14	yes	no	no
MAPK1IP1L	yes	no	no
MAPK8	yes	no	no
MAPKAPK5	yes	no	no
MAPRE2	yes	no	no
MARCKS	yes	no	no
MARK3	yes	no	no
MARS1	yes	no	no
MASTL	yes	no	no
MAT2A	yes	no	no
MATR3	yes	no	no
MAZ	yes	no	no
MB	yes	no	no
MBD2	yes	no	no
MBD6	yes	no	no
MBLAC1	yes	no	no
MBLAC2	yes	no	no
MBNL1	yes	no	no
MBTD1	yes	no	no
MC1R	yes	no	no
MCCC1	yes	no	no
MCF2L	yes	no	no
MCL1	yes	no	no
MCM10	yes	no	no
MCM4	yes	no	no
MCM7	yes	no	no
MCOLN1	yes	no	no
MDC1	yes	no	no
MDFI	yes	no	no
MDH1	yes	no	no
MDH2	yes	no	no
MDK	yes	no	no
MDP1	yes	no	no
MECOM	yes	no	no
MED12L	yes	no	no
MED22	yes	no	no
MED23	yes	no	no
MED25	yes	no	no
MED4	yes	no	no
MEF2D	yes	no	no
MEIOC	yes	no	no
MEIS1	yes	no	no
MELTF	yes	no	no
MEMO1	yes	no	no
MEPCE	yes	no	no
MERTK	yes	no	no
METTL21A	yes	no	no
METTL23	yes	no	no
METTL24	yes	no	no
METTL2B	yes	no	no
METTL7A	yes	no	no
METTL8	yes	no	no
METTL9	yes	no	no
MEX3C	yes	no	no
MFAP3L	yes	no	no
MFAP4	yes	no	no
MFF	yes	no	no
MFSD11	yes	no	no
MFSD14A	yes	no	no
MFSD8	yes	no	no
MGAT5	yes	no	no
MGST3	yes	no	no
MIA3	yes	no	no
MIDN	yes	no	no
MIEF2	yes	no	no
MIER1	yes	no	no
MINDY2	yes	no	no
MINDY4	yes	no	no
MINPP1	yes	no	no
MIS12	yes	no	no
MITD1	yes	no	no
MKKS	yes	no	no
MKRN2	yes	no	no
MKRN3	yes	no	no
MLEC	yes	no	no
MLH1	yes	no	no
MLLT10	yes	no	no
MLLT11	yes	no	no
MLST8	yes	no	no
MLX	yes	no	no
MMAA	yes	no	no
MMP11	yes	no	no
MMP15	yes	no	no
MMP24-AS1-EDEM2	yes	no	no
MMP24OS	yes	no	no
MNAT1	yes	no	no
MND1	yes	no	no
MNT	yes	no	no
MOB3A	yes	no	no
MOB4	yes	no	no
MON2	yes	no	no
MORC3	yes	no	no
MPDU1	yes	no	no
MPHOSPH6	yes	no	no
MPLKIP	yes	no	no
MPPE1	yes	no	no
MPV17	yes	no	no
MPV17L2	yes	no	no
MRM1	yes	no	no
MRPL1	yes	no	no
MRPL12	yes	no	no
MRPL21	yes	no	no
MRPL22	yes	no	no
MRPL30	yes	no	no
MRPL34	yes	no	no
MRPL38	yes	no	no
MRPL40	yes	no	no
MRPL44	yes	no	no
MRPL48	yes	no	no
MRPL53	yes	no	no
MRPL55	yes	no	no
MRPL57	yes	no	no
MRPL58	yes	no	no
MRPS15	yes	no	no
MRPS16	yes	no	no
MRPS18B	yes	no	no
MRPS18C	yes	no	no
MRPS2	yes	no	no
MRPS23	yes	no	no
MRPS26	yes	no	no
MRPS27	yes	no	no
MRPS31	yes	no	no
MRPS33	yes	no	no
MRPS35	yes	no	no
MRRF	yes	no	no
MSANTD2	yes	no	no
MSANTD3	yes	no	no
MSANTD4	yes	no	no
MSGN1	yes	no	no
MSMP	yes	no	no
MTARC1	yes	no	no
MTERF1	yes	no	no
MTERF4	yes	no	no
MTFP1	yes	no	no
MTHFD1	yes	no	no
MTHFR	yes	no	no
MTIF2	yes	no	no
MTIF3	yes	no	no
MTMR14	yes	no	no
MTMR4	yes	no	no
MTMR6	yes	no	no
MTMR9	yes	no	no
MTRR	yes	no	no
MTTP	yes	no	no
MTUS1	yes	no	no
MTX2	yes	no	no
MUS81	yes	no	no
MVP	yes	no	no
MXD1	yes	no	no
MXI1	yes	no	no
MXRA8	yes	no	no
MYC	yes	no	no
MYCBP2	yes	no	no
MYLIP	yes	no	no
MYLK4	yes	no	no
MYNN	yes	no	no
MYO3B	yes	no	no
MZT1	yes	no	no
N4BP1	yes	no	no
N4BP2	yes	no	no
NAA16	yes	no	no
NAA25	yes	no	no
NAA38	yes	no	no
NAA60	yes	no	no
NAALAD2	yes	no	no
NABP2	yes	no	no
NACAD	yes	no	no
NADK2	yes	no	no
NAE1	yes	no	no
NAGLU	yes	no	no
NALCN	yes	no	no
NAMPT	yes	no	no
NANP	yes	no	no
NAP1L1	yes	no	no
NAPA	yes	no	no
NAPEPLD	yes	no	no
NARF	yes	no	no
NAT10	yes	no	no
NBEA	yes	no	no
NBN	yes	no	no
NBPF1	yes	no	no
NCAM1	yes	no	no
NCBP1	yes	no	no
NCDN	yes	no	no
NCOA3	yes	no	no
NCOA7	yes	no	no
NCS1	yes	no	no
NDC1	yes	no	no
NDRG2	yes	no	no
NDST1	yes	no	no
NDUFA10	yes	no	no
NDUFA11	yes	no	no
NDUFAB1	yes	no	no
NDUFAF3	yes	no	no
NDUFAF4	yes	no	no
NDUFB2	yes	no	no
NDUFB7	yes	no	no
NDUFC1	yes	no	no
NDUFC2	yes	no	no
NDUFC2-KCTD14	yes	no	no
NDUFS1	yes	no	no
NDUFS3	yes	no	no
NDUFS7	yes	no	no
NEFM	yes	no	no
NEIL2	yes	no	no
NEK3	yes	no	no
NEK4	yes	no	no
NEK8	yes	no	no
NEK9	yes	no	no
NELFE	yes	no	no
NEMF	yes	no	no
NET1	yes	no	no
NEU1	yes	no	no
NEURL1	yes	no	no
NEURL2	yes	no	no
NF1	yes	no	no
NFAT5	yes	no	no
NFATC3	yes	no	no
NFATC4	yes	no	no
NFE2L2	yes	no	no
NFIB	yes	no	no
NFKB2	yes	no	no
NFKBIA	yes	no	no
NFKBID	yes	no	no
NFKBIL1	yes	no	no
NFXL1	yes	no	no
NGRN	yes	no	no
NHLRC4	yes	no	no
NIF3L1	yes	no	no
NIP7	yes	no	no
NIPA1	yes	no	no
NKIRAS2	yes	no	no
NLE1	yes	no	no
NLRX1	yes	no	no
NME1	yes	no	no
NME1-NME2	yes	no	no
NME5	yes	no	no
NME6	yes	no	no
NMI	yes	no	no
NMNAT1	yes	no	no
NOC3L	yes	no	no
NOCT	yes	no	no
NOD1	yes	no	no
NOL11	yes	no	no
NOL12	yes	no	no
NOL4L	yes	no	no
NOL8	yes	no	no
NOLC1	yes	no	no
NOP2	yes	no	no
NOP53	yes	no	no
NOP56	yes	no	no
NOP58	yes	no	no
NOS1	yes	no	no
NOS3	yes	no	no
NOX5	yes	no	no
NOXO1	yes	no	no
NPTN	yes	no	no
NQO1	yes	no	no
NR1H2	yes	no	no
NR2E3	yes	no	no
NR2F6	yes	no	no
NR3C1	yes	no	no
NR4A3	yes	no	no
NRCAM	yes	no	no
NRDC	yes	no	no
NREP	yes	no	no
NRP2	yes	no	no
NRXN3	yes	no	no
NSA2	yes	no	no
NSD3	yes	no	no
NSL1	yes	no	no
NSMCE4A	yes	no	no
NSUN3	yes	no	no
NSUN4	yes	no	no
NSUN6	yes	no	no
NSUN7	yes	no	no
NTN3	yes	no	no
NTRK1	yes	no	no
NUBP1	yes	no	no
NUDT15	yes	no	no
NUDT19	yes	no	no
NUF2	yes	no	no
NUMB	yes	no	no
NUP133	yes	no	no
NUP153	yes	no	no
NUP35	yes	no	no
NUP37	yes	no	no
NUP42	yes	no	no
NUP54	yes	no	no
NUP62	yes	no	no
NUP85	yes	no	no
NUP88	yes	no	no
NUSAP1	yes	no	no
NYAP1	yes	no	no
OARD1	yes	no	no
OBI1	yes	no	no
OFD1	yes	no	no
OGFOD2	yes	no	no
OGG1	yes	no	no
OPA1	yes	no	no
OR1F1	yes	no	no
ORC2	yes	no	no
OSBPL7	yes	no	no
OSBPL9	yes	no	no
OSCP1	yes	no	no
OST4	yes	no	no
OTUD3	yes	no	no
OTUD7B	yes	no	no
OVCA2	yes	no	no
P2RX1	yes	no	no
P2RX6	yes	no	no
P2RY6	yes	no	no
PABPN1	yes	no	no
PACSIN3	yes	no	no
PADI2	yes	no	no
PAFAH2	yes	no	no
PAGR1	yes	no	no
PAK2	yes	no	no
PALB2	yes	no	no
PAMR1	yes	no	no
PAN2	yes	no	no
PAN3	yes	no	no
PANK1	yes	no	no
PAQR6	yes	no	no
PAQR8	yes	no	no
PARK7	yes	no	no
PARN	yes	no	no
PARP14	yes	no	no
PARP2	yes	no	no
PARP8	yes	no	no
PARP9	yes	no	no
PARPBP	yes	no	no
PATZ1	yes	no	no
PAXBP1	yes	no	no
PBK	yes	no	no
PBLD	yes	no	no
PCBD1	yes	no	no
PCBP2	yes	no	no
PCBP4	yes	no	no
PCDH15	yes	no	no
PCDH17	yes	no	no
PCDH8	yes	no	no
PCDH9	yes	no	no
PCDHAC1	yes	no	no
PCDHAC2	yes	no	no
PCGF1	yes	no	no
PCID2	yes	no	no
PCM1	yes	no	no
PCOLCE	yes	no	no
PCSK1	yes	no	no
PCSK2	yes	no	no
PCYT1A	yes	no	no
PDAP1	yes	no	no
PDCD6	yes	no	no
PDCD7	yes	no	no
PDE2A	yes	no	no
PDE3A	yes	no	no
PDE4D	yes	no	no
PDE6D	yes	no	no
PDE7A	yes	no	no
PDE7B	yes	no	no
PDE8A	yes	no	no
PDE9A	yes	no	no
PDGFRA	yes	no	no
PDGFRB	yes	no	no
PDHX	yes	no	no
PDIA6	yes	no	no
PDSS1	yes	no	no
PDZD7	yes	no	no
PDZRN4	yes	no	no
PEAK1	yes	no	no
PELO	yes	no	no
PET117	yes	no	no
PEX1	yes	no	no
PEX11A	yes	no	no
PEX12	yes	no	no
PEX13	yes	no	no
PEX2	yes	no	no
PEX3	yes	no	no
PFDN4	yes	no	no
PFKFB3	yes	no	no
PFKM	yes	no	no
PGAP1	yes	no	no
PGAP3	yes	no	no
PGD	yes	no	no
PGLS	yes	no	no
PGS1	yes	no	no
PHACTR2	yes	no	no
PHACTR4	yes	no	no
PHAX	yes	no	no
PHB2	yes	no	no
PHF23	yes	no	no
PHF5A	yes	no	no
PHKA2	yes	no	no
PHLPP1	yes	no	no
PHOX2A	yes	no	no
PHOX2B	yes	no	no
PHYH	yes	no	no
PI4KB	yes	no	no
PIF1	yes	no	no
PIGO	yes	no	no
PIGQ	yes	no	no
PIGV	yes	no	no
PIGW	yes	no	no
PIGY	yes	no	no
PIH1D1	yes	no	no
PIK3C2A	yes	no	no
PIK3IP1	yes	no	no
PIK3R3	yes	no	no
PIK3R4	yes	no	no
PIKFYVE	yes	no	no
PIM2	yes	no	no
PIN1	yes	no	no
PIN4	yes	no	no
PIP4K2B	yes	no	no
PIP5KL1	yes	no	no
PISD	yes	no	no
PITPNC1	yes	no	no
PKD2L2	yes	no	no
PKDCC	yes	no	no
PKDREJ	yes	no	no
PKIA	yes	no	no
PKM	yes	no	no
PKN2	yes	no	no
PLA2G4E	yes	no	no
PLA2R1	yes	no	no
PLAAT3	yes	no	no
PLAT	yes	no	no
PLCD4	yes	no	no
PLCH2	yes	no	no
PLCXD3	yes	no	no
PLEC	yes	no	no
PLEKHA3	yes	no	no
PLEKHA6	yes	no	no
PLEKHA8	yes	no	no
PLEKHG2	yes	no	no
PLEKHG5	yes	no	no
PLEKHM3	yes	no	no
PLET1	yes	no	no
PLIN2	yes	no	no
PLK1	yes	no	no
PLK3	yes	no	no
PLPBP	yes	no	no
PLS1	yes	no	no
PLXDC1	yes	no	no
PLXNA1	yes	no	no
PMS2	yes	no	no
PNKP	yes	no	no
PNMA1	yes	no	no
PNOC	yes	no	no
PNPLA6	yes	no	no
PNPLA8	yes	no	no
PNRC2	yes	no	no
POC1B	yes	no	no
POC1B-GALNT4	yes	no	no
POGK	yes	no	no
POGLUT2	yes	no	no
POLA1	yes	no	no
POLDIP2	yes	no	no
POLDIP3	yes	no	no
POLG	yes	no	no
POLG2	yes	no	no
POLR1B	yes	no	no
POLR2A	yes	no	no
POLR2H	yes	no	no
POLR3A	yes	no	no
POLR3B	yes	no	no
POLR3C	yes	no	no
POLR3D	yes	no	no
POLR3E	yes	no	no
POLR3F	yes	no	no
POLR3G	yes	no	no
POLR3GL	yes	no	no
POMP	yes	no	no
POMT1	yes	no	no
PON2	yes	no	no
POPDC2	yes	no	no
POR	yes	no	no
PPFIBP2	yes	no	no
PPIF	yes	no	no
PPIG	yes	no	no
PPIL1	yes	no	no
PPIL2	yes	no	no
PPIL3	yes	no	no
PPIP5K2	yes	no	no
PPM1A	yes	no	no
PPM1G	yes	no	no
PPM1L	yes	no	no
PPM1M	yes	no	no
PPP1R11	yes	no	no
PPP1R12C	yes	no	no
PPP1R15B	yes	no	no
PPP1R18	yes	no	no
PPP1R2	yes	no	no
PPP1R21	yes	no	no
[truncated: 1,102 more rows]
