# Supplementary material for: Coding and noncoding variants in EBF3 are involved in HADDS and simplex autism
Source: Hum Genomics. 2021 Jul 13;15:44. doi: 10.1186/s40246-021-00342-3 (PMC8278787; doi:10.1186/s40246-021-00342-3)
Supplement: Supplementary file 6 — Additional file 6: Table S10: should have the label "Phenotypes of individuals with coding and noncoding variants affecting EBF3. [file 40246_2021_342_MOESM6_ESM.xlsx]

## Sheet: Sheet1
	Subject 1	Subject 2	Mother	Subject 3	Subject 4	Subject 5	Subject 6	Subject 7	Subject 8	Subject 9	Subject 10	Proband 1	Proband 2	Proband 3	Patient 1	Patient 2	Patient 3	Patient 4	proband	mother	family 14 Subukhtazeen	11257.p1	12975.p1	13396.p1
Study	Harms et al 2016	Harms et al 2016	Harms et al 2016	Harms et al 2016	Harms et al 2016	Harms et al 2016	Harms et al 2016	Harms et al 2016	Harms et al 2016	Harms et al 2016	Harms et al 2016	Chao et al 2016	Chao et al 2016	Chao et al 2016	Current study (Marjolaine WILLEMS)	Current study (Marjolaine WILLEMS)	Current study (Lucile PINSON)	Current study (Lucile PINSON)	Brest France case	Brest France case	current study	Padhi et al 2020	Padhi et al 2020	Padhi et al 2020
Mutation type	Coding	Coding	Coding	Coding	Coding	Coding	Coding	Coding	Coding	Coding	Coding	Coding	Coding	Coding	Coding	Coding	Coding	Coding	Coding	Coding	coding	Noncoding	Noncoding	Noncoding
Mutation in EBF3	c.625C>T p.Arg209Trp	c.625C>T p.Arg209Trp	c.[625C=/T]	c.913C>T p.Gln305*	c.196A>G p.Asn66Asp	c.1101+1G>T	c.530C>T p.Pro177Leu	c.422A>G p.Trys141Cys	c.512G>A p.Gly171Asp	c.907C>T p.Arg303*	c.469_477dup p.His157+Ile159_dup	c.488G>A p.Arg163Gln	c.488G>T p.Arg163Leu	c.488G>T p.Arg163Leu	NM_001005463.2	NM_001005463.2	NM_001005463.2	NM_001005463.2	NM_001005463.2	NM_001005463.2		NA	NA	NA
Transcript	NM_001005463.2	NM_001005463.2	NM_001005463.2	NM_001005463.2	NM_001005463.2	NM_001005463.2	NM_001005463.2	NM_001005463.2	NM_001005463.2	NM_001005463.2	NM_001005463.2	NM_001005463.2	NM_001005463.2	NM_001005463.2	c.1581_1582del p.Pro528Serfs*64	c.1581_1582del p.Pro528Serfs*64	c.1581_1582del p.Pro528Serfs*64	c.1581_1582del p.Pro528Serfs*64	c.663_685del	c.663_685del	EBF3, ENST00000355311.9:c.805A>G, ENSP00000347463.4:p.Ser269Gly het	NA	NA	NA
Origin of mutation	Inherited	Inherited	de novo (mosaicism)	de novo	de novo	de novo	de novo	de novo	de novo	de novo	de novo	de novo	de novo	de novo	Inherited	?	Inherited	?	inherited	de novo	de novo	de novo	de novo	de novo
Sex	female	male	female	male	male	male	female	male	female	female	male	male	female	female	Female	Male	Female	Female	female	female	male	male	male	male
Age at assessment	9 years, 3 months	3 years, 4 months	33 years	5 years, 9 months	16 years, 6 months	4 years, 6 months	2 years, 7 months	1 year, 11 months	13 years	25 years	3 years, 5 months	NA	NA	NA	10 year 6 month	47 years	6 years 5 month	44 years	17 year	39 year	8yrs, 5mo	5 years, 6 months	10 year, 5 months	7 year, 10 months
Birth weight in grams (SD)	2,500(-2)	1780(-3.5)	NA	2495(-2)	3500(-0.2)	4054(+0.7)	3033(-0.7)	2891(-1)	3068(-0.6)	2900(-1)	3190(-0.7)	NA	NA	NA	2880 (-1)	1500	2460(-2)	2500	2920		3000	NA	3175	2636
Birth length in cm (SD)	NA	NA	NA	45.7(-2)	50.8(+0.3)	NA	NA	48.2(-0.7)	49.5(0)	NA	49(-0.25)	NA	NA	NA	49 (M)	50	45,5(-2)	50	49		NA	NA	NA	NA
OFC at birth in cm (SD)	NA	NA	NA	33.5(-1.3)	NA	NA	NA	35.5(-0.25)	NA	NA	36(+1)	NA	NA	NA	33(-1)	NA	31(-2,5)	NA	33		NA	NA	"normal"	NA
Weight in kg (SD)	22(-2)	11(-2)	NA	21(+0.5)	45.8(-2.2)	25.67(+3.4)	13.3(0)	10.6(-1.5)	42.2(-1)	55(-0.5)	12.4(-1)	NA	NA	NA	33(+0,2)	79(+2)	16,8(-1,8)	NA	45.5	NA	32kg(75th-91st)	NA	28.3(-1)	31.4(1.21)
Length in cm (SD)	119(-3)	91(-2)	NA	108(-1.2)	168.6(-0.8)	110.49(+1)	90.2(-0.2)	NA	NA	167(+0.8)	95(-1)	NA	NA	NA	132,5(-0,8)	168(-1,2)	107(-1,8)	152(-2)	152.5	NA	127cm(9-25th)	NA	147.6(1.17)	136(1.52)
OFC in cm (SD)	50(-3)	48.3(-2.5)	NA	51.5(-1)	57(+0.7)	NA	49.75(+1)	49.5(+0.7)	51.9(-1.7)	NA	51(+0.5)	NA	NA	NA	50,5(-1,5)	NA	46,5(-3,5)	52.5	55.4	NA	52cm	NA	53.8(0.15)	57 (3.22)
Neurological abnormalities
ID	+	+	-	+	+	+	+	+	+	+	+	+	+	+	+	?	NA	-	-		Yes	-	-	-
Motor developmental delay	+	+	-	+	+	+	+	+	+	+	+	+	+	+	+	NA	+	?	+	+	Yes	-	-	+
Speech delay	+	+	-	+	+	+	+	+	+	+	+	+	+	+	+	+	+	+	-	-	Yes	-	+	-
Global developmental delay	-	-	-	-	-	-	-	-	-	-	-	+	+	+	+	NA	+	NA	+	+	Yes	-	-	-
Expressive speech disorder	-	-	-	-	-	-	-	-	-	-	-	+	+	+	+	NA	+	NA	-	-	Yes	-	-	-
Ataxia	+	+	-	+	+	NA	+	-	wide-based bent kneee,dystonic gait	-	NA	+	+	+	-	-	-	-	-		Yes	-	-	-
Seizures	+	+	-	-	-	-	-	-	NA	-	-	-	-	-	-	-	-	-	-	-	Yes	-	-	-
Tone	normal	normal	normal	mild hypotonia, normal in early childhood, normal now	normal	Truncal hypotonia	Truncal hypotonia	hypotonia	hypotonia as infant, dystonia now	normal	truncal hypotonia	hypotonia	hypotonia	hypotonia	hypotonia	NA	Peripheral hypertonia	Hypotonia	-		hypotonia	hypotonia	hypotonia	hypotonia
Brain MRI	normal	not determined	not determined	normal	Cerebellar-vermian hypoplasia	normal	normal	normal	normal	not determined	Cerebellar-vermian hypoplasia	Vermian hypoplasia Mild prominenece of ventricles and sulci decreased cerebellar hemisphere volume	Vermian hypoplasia	normal	NA	NA	NA	NA	normal		NA	NA	normal	NA
Other diagnoses
Facial weakness	-	-	-	-	-	-	-	-	-	-	-	+	+	+	+	-	+	+	-		No	-	-	-
Pain insenstivity	-	-	-	-	-	-	-	-	-	-	-	-	+	+	+	-	+	-	-		No	-	-	-
Dysphagia	-	-	-	-	-	-	-	-	-	-	-	+	+	-	-	-	+ then -	+	-		No	-	-	-
Facial dysmorphisms	+	+	+	-	+	NA	+	-	+	-	-	+	+	+	+	+	+	+	+		Yes	-	-	-
Autistic features	-	-	-	-	-	-	-	-	-	-	-	-	-	-	-	+	-	-	+	+	Yes (Stereotypic hand movements, spinning, hyperactivity, socialization problems, aggressive, hyposensitivity to touch)	+	+	+
Formal autism diagnosis	-	-	-	-	-	-	-	-	-	-	-	-	-	-	-	-	-	-	+	-	No	+	+	+
Anxiety disorder	-	-	-	-	-	-	-	-	-	-	-	-	-	-	+	-	+	+	+		No	-	-	+
Eating disorder	-	-	-	-	-	-	-	-	-	-	-	-	-	-	-	-	+	-	-		No	-	+	-
ADHD	-	-	-	-	+	-	-	-	-	-	-	-	-	-	-	-	+	-	-		No	-	+	+
Poor eye contact	-	-	-	-	-	-	-	-	-	-	-	-	-	-	-	+	-	-	-		Yes	+	+	+
Gastrointestinal dysfunction	-	-	-	-	+	-	-	-	+	-	+	-	-	+	+	-	+	-	-		No	+	+	-
Genital anomalies	-	-	-	-	+	-	-	-	-	-	-	+	+	-	-	-	-	-	-		No	-	-	-
Reduced fetal movement	-	-	-	-	-	-	-	-	-	-	-	+	+	-	-	NA	-	NA	-		Yes, Oligohydramnios	-	-	-
Craniofacial Abnormalities
Long face	+	+	+	-	+	NA	NA	-	+	+	-	-	-	-	+	-	+	-	+		Yes	-	-	-
Deep philtrum	+	+	+	-	+	NA	+	-	+	-	-	-	-	-	-	+	-	-	-		No	-	-
Tall forehead	+	+	+	-	+	NA	+	-	+	+	-	-	-	-	-	-	-	-	-		Yes	-	-	-
High nasal bridge	+	+	+	-	+	NA	NA	-	+	+	-	-	-	-	+	+	+	+	-		Yes	-	-	-
Straight eyebrows	+	+	-	+	+	+	+	+	+	-	+	-	-	-	-	-	-	-	-		No	-	-	-
Strabismus	+	+	-	+	+	+	+	+	+	-	+	-	+	+	-	-	-	-	+	+	No	-	-	-
Ears	low set, posteriorly rotated, small ear lobes	low set, posteriorly rotated	low set, posteriorly rotated	-	small ear lobes	NA	NA	-	normal	NA	low set	-	-	-	-	-	-	-	-		low set	-	-	-
Short and borad chin	+	+	+	-	+	NA	NA	-	prominent chin	broad chin	-	-	-	-	+	+	+	+	-		Yes	-	-	-
Other	thick vermillion of of upper and lower lips	-	-	small mouth, short philtrum, micognathia	thick vermillion of of upper and lower lips	flat nasal bridge	relative macrocephaly, upward slanting palpebral fissures, long eyelashes straight hair	hypertelorism	facial asymmetry,submucous cleft palate	upward-slanting palpebral fissures, broad nasal bridge, smooth philtrum, thin upper lip, chin dimple	thin lower lip	-	-	-	epicanthus, smooth philtrum	-	-	-	flat foot, long arms, long face		Synorphys	-	-	-
Other findings
Additional clincal anomalies, (accounted for in above categories where category existed)	-	-	-	syndactyly of the second and third toes, inguinal hernia	dysarthria,pectus excavatum, thin and scooped nails, orchiopexy for undescended testicles, very mild hypospadias, strabismus surgery, intoeing due to femoral anteverssion, ADHD, gastroesophageal reflux, possible eosinphilic esophagitis	-	-	congential heart disease (atrial septal defect)	complete(right) and partial (left) syndactyly of the second and third toes, limited facial expression, neurogenic bladder (vesicostomy), feeding difficulties, swallowing of semisolid food only, mild scoliosis, dysplastic right kidney, vesicoureteric reflux, megacolon with intractable constipation, severe hip and knee contractures	-	bilateral talipes, equinovarus phimosis, recurrent lower urinary-tract infections, constipation	-	-	-	Bruxism, outspread nipples, pectus excavatum, scoliosis, overlapping teeth	-	Hypertrichosis, hypermetropia, short fifth finger, peripheral hypertonia, dyasrthria, nasal voice, pes planus, hyperlaxity, dysmetry?, blue sclerea	Scoliosis, mitral insufficiency, asthma, blue sclerea	strabismus surgery , scoliosis surgery, ligament hyperlaxity, bilateral elbow valgus, constipation, psychological support	strabismus surgery scoliosis surgery hyperlaxity		-	-	-
